# Supplementary material for: Selective adsorption of chlorinated volatile organic compound vapours by microcrystalline 1D coordination polymers
Source: Royal Society of Chemistry journal article supplement (doi:10.1039/c6dt03803d), 2016-01-01

## Supporting Information for

# “Selective Adsorption of Chlorinated Volatile Organic Compounds Vapors by Microcrystalline 1D Coordination Polymers”

Massimo Cametti<sup>a\*</sup> and Javier Martí-Rujas<sup>b\*</sup>

<sup>a</sup> Dipartimento di Chimica Materiali e Ingegneria Chimica. “Giulio Natta”, Politecnico di Milano, Via L. Mancinelli 7, 20131 Milan, Italy.

<sup>b</sup> Center for Nano Science and Technology@Polimi, Istituto Italiano di Tecnologia, Via Pascoli 70/3, 20133 Milano, Italy.

## Content

### Experimental

#### Solid liquid interface reactions.

**Figure S1.** Solid-liquid interface synthesis of **1-3<sup>Pwd</sup>**.

**Figure S2.** Several pictures taken during the small-scale synthesis of **1<sup>Pwd</sup>** coordination polymer using the solid-liquid interface reaction method. Where X in  $ZnX_2$  is Cl, Br or I. In this case X = Cl.

**Figure S3.** Experimental XRPD obtained after adding a MeOH solution of  $ZnX_2$  (where X = Cl, Br and I) into a suspension of **L** in MeCN.

**Figure S4.** Experimental XRPD corresponding to **L**.

**Figure S5.** Experimental XRPD corresponding to **1·TCM** obtained by fast precipitation (*i.e.*, instant synthesis) and measured at 300 K.

**Figure S6.** SCSC guest exchange process where the original TCM guest molecules are replaced by MeCN.

**Figure S7.** (Top) Single crystal preparation of **1-3·TCM<sup>SC</sup>**. (Bottom) Summary explaining the two methods (*i.e.*, slow crystallization (layering) and fast crystallization (solid liquid interface reaction) carried out in this work. Inset showing the SC-to-SC guest exchange reactions done.

**Table S1.** Crystallographic data regarding the lattice parameters of **2·TCM<sup>SC</sup>**.

**Figure S8.** Single crystal data of **2·TCM<sup>SC</sup>** measured at 100K.

**Figure S9.** Simulated XRPD obtained from the single crystal **2·TCM<sup>SC</sup>**.

**Table S2.** Crystallographic data regarding the lattice parameters of **3·TCM<sup>SC</sup>**.

**Figure S10.** Single crystal data of **3·TCM<sup>SC</sup>** viewed along the *a*-axis.

**Figure S11.** Simulated XRPD of **3·TCM<sup>SC</sup>**.

**Figure S12.** Crystal packing of **1-3·TCM<sup>SC</sup>** showing the hydrogen bonding interactions between TCM and the iminic N atoms as dashed black lines.

**Figure S13.** Crystal structure of **1·MeCN<sup>SC</sup>** obtained after SC-to-SC according to Figure S6. Inset: view of the MeCN guest molecule with the displacement ellipsoids showing that the vibration is along the channel direction.

**Figure S14.** Experimental SLI of ZnCl<sub>2</sub> in MeCN. Simulated after guest exchange of **1·TCM<sup>SC</sup>** for MeCN to give **1·MeCN<sup>SC</sup>**.

**Figure S15.** Crystal structure of **2·MeCN<sup>SC</sup>** obtained after SCSC according to Figure S6.

**Figure S16.** Experimental SLI of ZnBr<sub>2</sub> in MeCN. Simulated after guest exchange of **2·TCM<sup>SC</sup>** for MeCN to give **2·MeCN<sup>SC</sup>**.

**Figure S17.** Crystal structure of **3·MeCN<sup>SC</sup>** obtained after SCSC according to Figure S6.

**Figure S18.** (Top) Experimental XRPD pattern obtained using the solid liquid interface method by adding ZnI<sub>2</sub> in MeOH to a suspension of **L** in MeCN vigorously stirred. (Bottom) Simulated XRPD pattern obtained after a SC-to-SC guest exchange of **3·TCM<sup>SC</sup>** for MeCN to give **3·MeCN<sup>SC</sup>**. The good match between both XRPD patterns confirms that MeCN replaced the original TCM guest molecule.

**Figure S19.** Experimental XRPD diffraction patterns measured at room temperature of **3·MeCN<sup>Pwd</sup>** (a) exposed to DCE to give **3·DCE<sup>Pwd</sup>**(b), TCE to give **3·TCE<sup>Pwd</sup>** (c), TCM to give **3·TCM<sup>Pwd</sup>** (d) and DCM to give **3·DCM<sup>Pwd</sup>** (e). It is clear that there is an anisotropic peak shift

corroborating the structural adaptation to the different guest molecules and that the structure is maintained after the guest exchange.

**Table S3.** Crystallographic data regarding the lattice parameters of **1·TCE<sup>SC</sup>**.

**Figure S20.** Crystal packing of **1·TCE<sup>SC</sup>** showing the inclusion of TCE guest molecules in the 1D channels.

**NMR analysis:**

**Figure S21.** <sup>1</sup>H-NMR characterization in DMSO-d<sub>6</sub> of sample **3<sup>Pwd</sup>** exposed to TCM vapors for 24h a) and b) after thermal treatment under reduced pressure (80°C for 10 h).

**Figure S22.** a) <sup>1</sup>H-NMR characterization in DMSO-d<sub>6</sub> of **3<sup>Pwd</sup>**; b) after exposure for 24h to TCM vapors and c) after thermal treatment under reduced pressure (80°C for 10 h).

**Figure S23.** <sup>1</sup>H-NMR characterization in DMSO-d<sub>6</sub> of materials **1-3<sup>Pwd</sup>**, as synthesized, showing the presence of MeCN.

**Figure S24.** Plot of the *R* factor over time for various solvents in samples of **1<sup>Pwd</sup>** as measured by <sup>1</sup>H-NMR. Samples were exposed to each solvent for 24 h and then left in ambient condition. *R* factors were calculated by using nitromethane as internal standard.

**Figure S25.** Plot of the ATR-FT-IR spectra in the 2450-2000 cm<sup>-1</sup> region of a) **3<sup>Pwd</sup>** as synthesized and of the material exposed to vapours of TCE, DCE, DCM and TCM. The absorption peak at 2248 cm<sup>-1</sup> corresponds to included MeCN molecules.

**CheckCIF files** CCDC **2·TCM<sup>SC</sup>**: 1497288; **3·TCM<sup>SC</sup>**: 1497289; **1·TCE<sup>SC</sup>**: 1497290; **1·MeCN<sup>SC</sup>** 1507642; **2·MeCN<sup>SC</sup>** 1507643; **3·MeCN<sup>SC</sup>** 1507644; **3·MeCN<sup>SC</sup> (100K)** 1507645.

## Material and Methods

All the chemicals were purchased from Sigma-Aldrich and used without further purification. X-ray powder diffraction measurements were carried out using a D8-Advance Bruker diffractometer using the reflection mode at room temperature and Bruker D2-Phaser diffractometer also using reflection mode. Single crystal X-ray diffraction experiments were carried out using a Bruker X8 Prospector APEX-II/CCD diffractometer equipped with a microfocusing mirror (Cu-K $\alpha$  radiation,  $\lambda = 1.54178 \text{ \AA}$ ). The low and high temperature experiments were carried out using the Oxford Cryosystems 700 Series Cryostream Cooler device. Single crystals of **1-3**·TCM<sup>SC</sup> glued in a glass fiber were introduced in a sealed jar containing vapours of MeCN for single-crystal-to-single-crystal experiments overnight.

**Solid liquid interface reactions:** Microcrystalline solids of **1-3**<sup>Pwd</sup> were obtained by preparing a suspension of **L** in MeCN and left stirring vigorously for 5 minutes. Then a methanol solution of ZnX<sub>2</sub> (where X = Cl, Br, and I) was added in the suspension and left stirring for 5 minutes (Figure S1). Yield is calculated by considering the formula [(Y-ZnX<sub>2</sub>)·MeCN] (Y = **1-3**).

Preparation of **1**<sup>Pwd</sup>: 100 mg of **L** (0.2249 mmol) were suspended in 4 mL of MeCN and left stirring vigorously. Then 30.6 mg of ZnCl<sub>2</sub> (1 eq.) dissolved in 1 mL of MeOH were added to the suspension and left for 5 minutes. From the reaction, 133 mg of white solid was filtered and collected.

Preparation of **2**<sup>Pwd</sup>: 100 mg of **L** (0.2249 mmol) were suspended in 4 mL of MeCN and left stirring vigorously. Then 50.6 mg of ZnBr<sub>2</sub> (1 eq.) dissolved in 1 mL of MeOH were added to the suspension and left for 5 minutes. From the reaction, 150 mg of white solid was filtered and collected.

Preparation of **3**<sup>Pwd</sup>: 100 mg of **L** (0.2249 mmol) were suspended in 4 mL of MeCN and left stirring vigorously. Then 71.8 mg of ZnI<sub>2</sub> (1 eq.) dissolved in 1 mL of MeOH were added to the suspension and left for 5 minutes. From the reaction, 174 mg of white solid was filtered and collected.

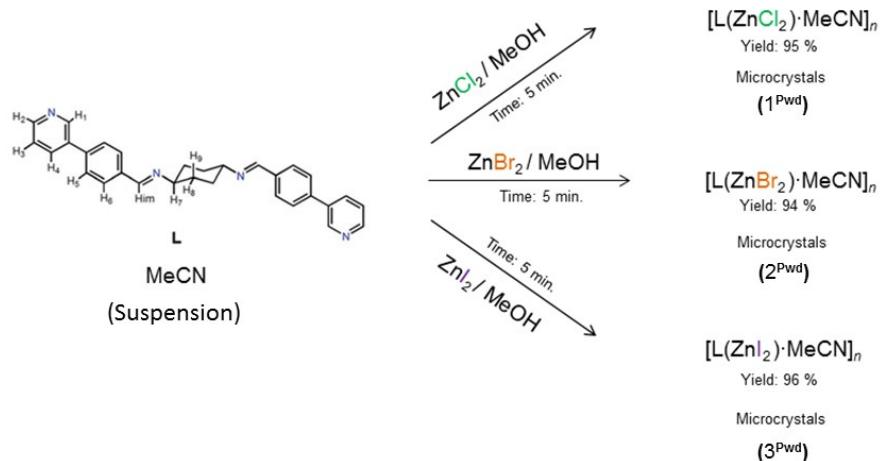

**Figure S1.** Solid-liquid interface synthesis of **1-3<sup>Pwd</sup>**.

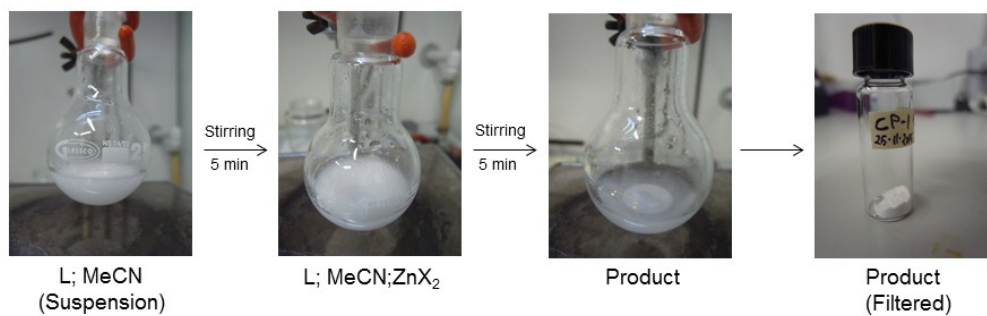

**Figure S2.** Several pictures taken during the small-scale synthesis of **1<sup>Pwd</sup>** coordination polymer using the solid-liquid interface reaction method. Where X in ZnX<sub>2</sub> is Cl, Br or I. In this case X = Cl.

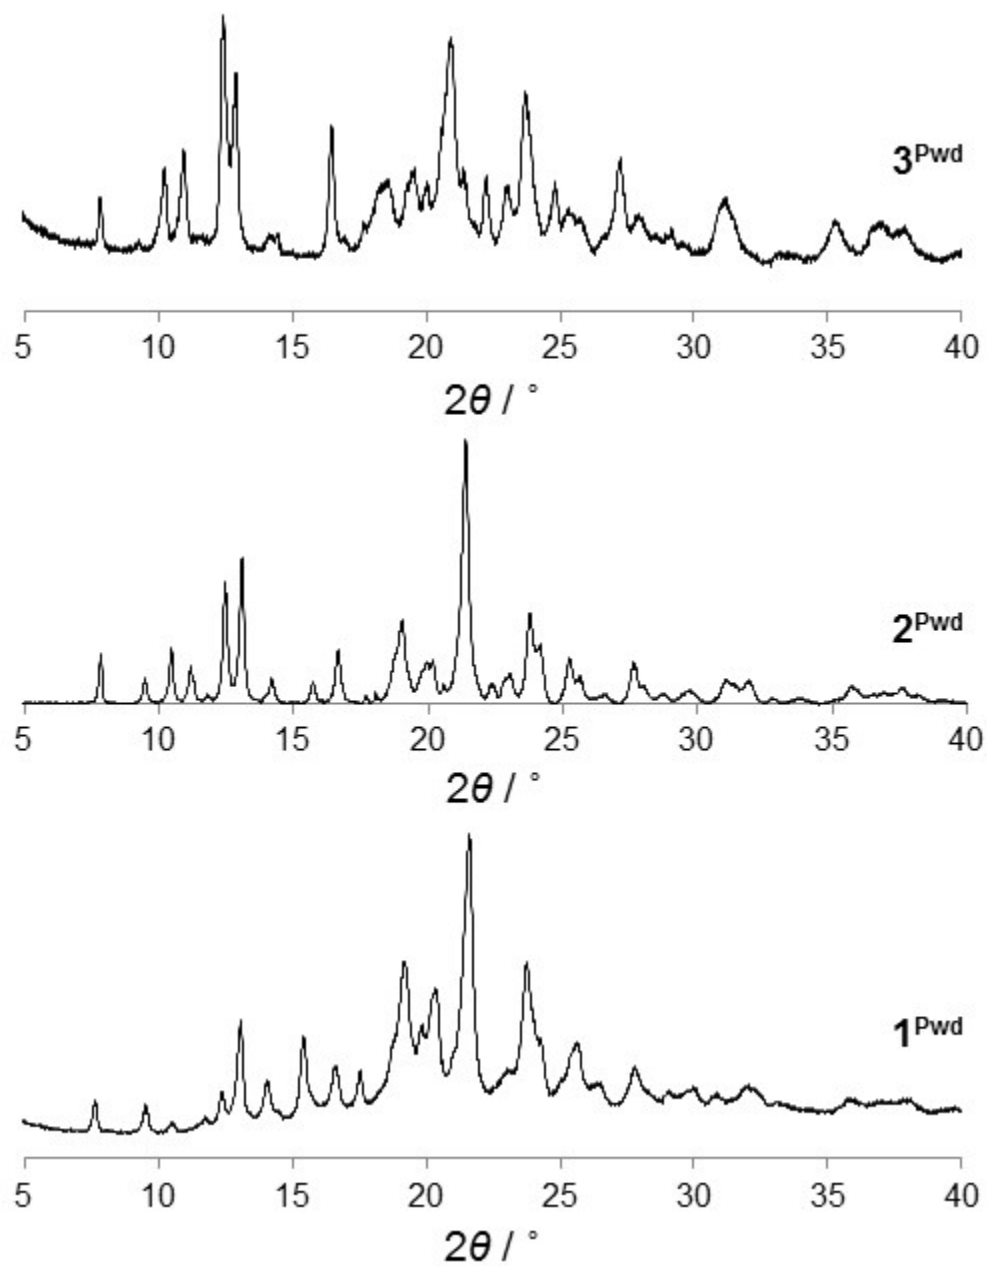

**Figure S3.** Experimental XRPD obtained after adding a MeOH solution of  $\text{ZnX}_2$  (where  $\text{X} = \text{Cl}$ ,  $\text{Br}$  and  $\text{I}$ ) into a suspension of **L** in MeCN.

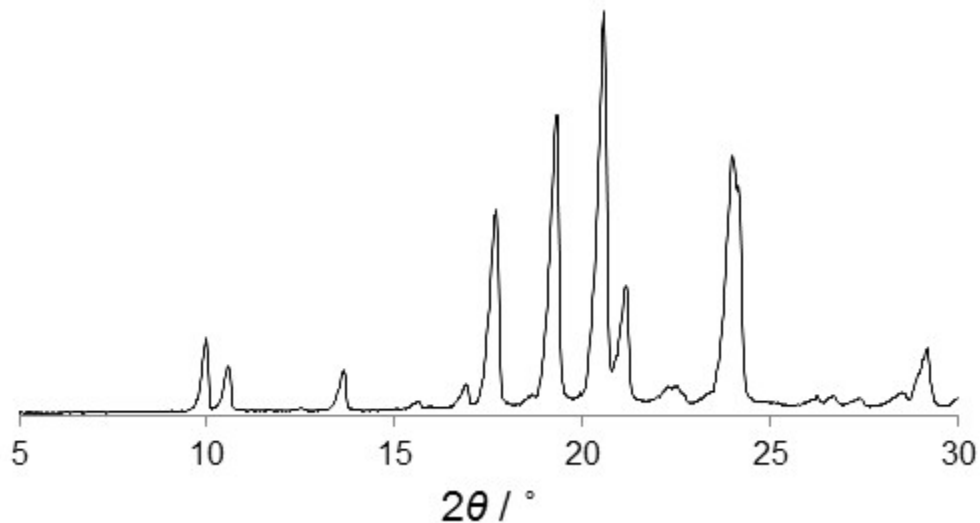

**Figure S4.** Experimental XRPD corresponding to **L**.

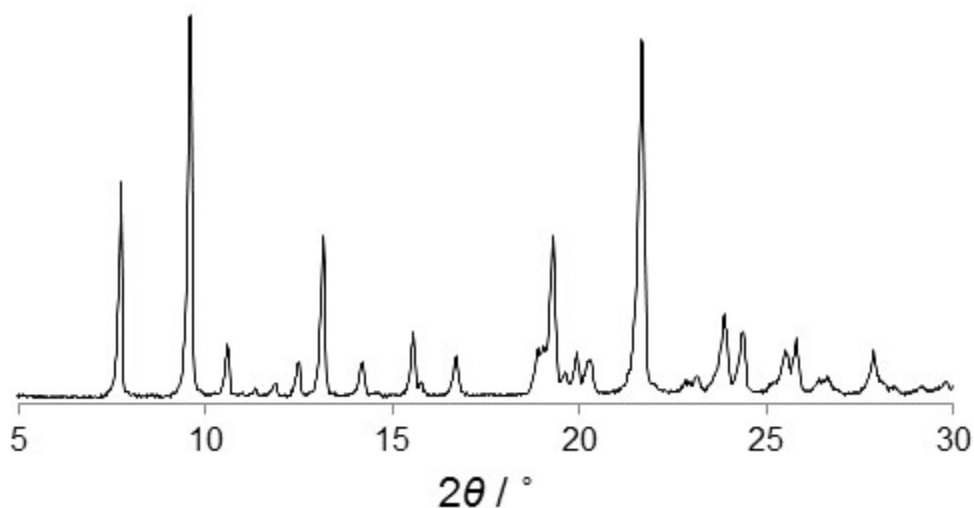

**Figure S5.** Experimental XRPD corresponding to **1·TCM** obtained by fast precipitation (*i.e.*, instant synthesis) and measured at 300 K. See *Chem. Commun.*, 2015, **51**, 12357.

Since the solid liquid interface intrinsically gives microcrystalline materials (*i.e.*, the starting materials are powders already) single crystal X-ray diffraction cannot be carried out. However, one way to know if the product obtained is an isostructural coordination polymer to **1-3·TCM<sup>SC</sup>**, we set up gas solid reactions in order to include MeCN in single crystals of **1-3·TCM<sup>SC</sup>** following a SC-to-SC guest exchange process where the original TCM guest molecules are replaced by MeCN as shown in Figure S6).

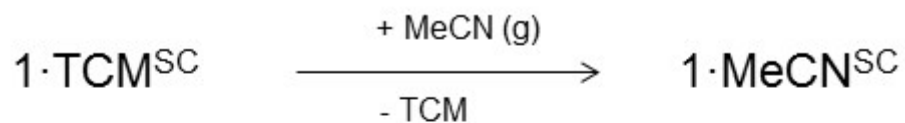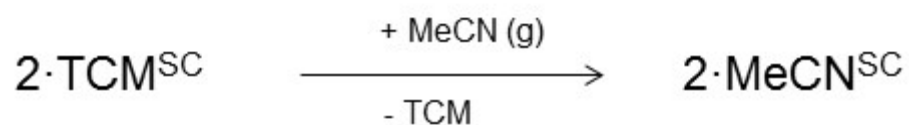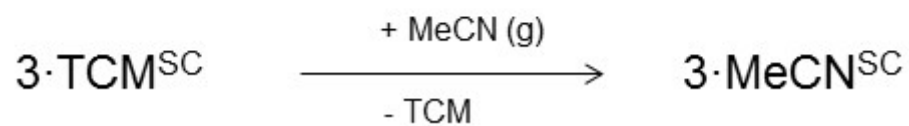

**Figure S6.** SC-to-SC guest exchange process where the original TCM guest molecules are replaced by MeCN.

In order to perform the experiments shown in Figure S6, single crystals of the bromide and iodide which are isostructural to  $1 \cdot \text{TCM}^{\text{SC}}$  were set up for crystallization following the triple layer method described in *Chem. Commun.*, 2015, **51**, 12357.



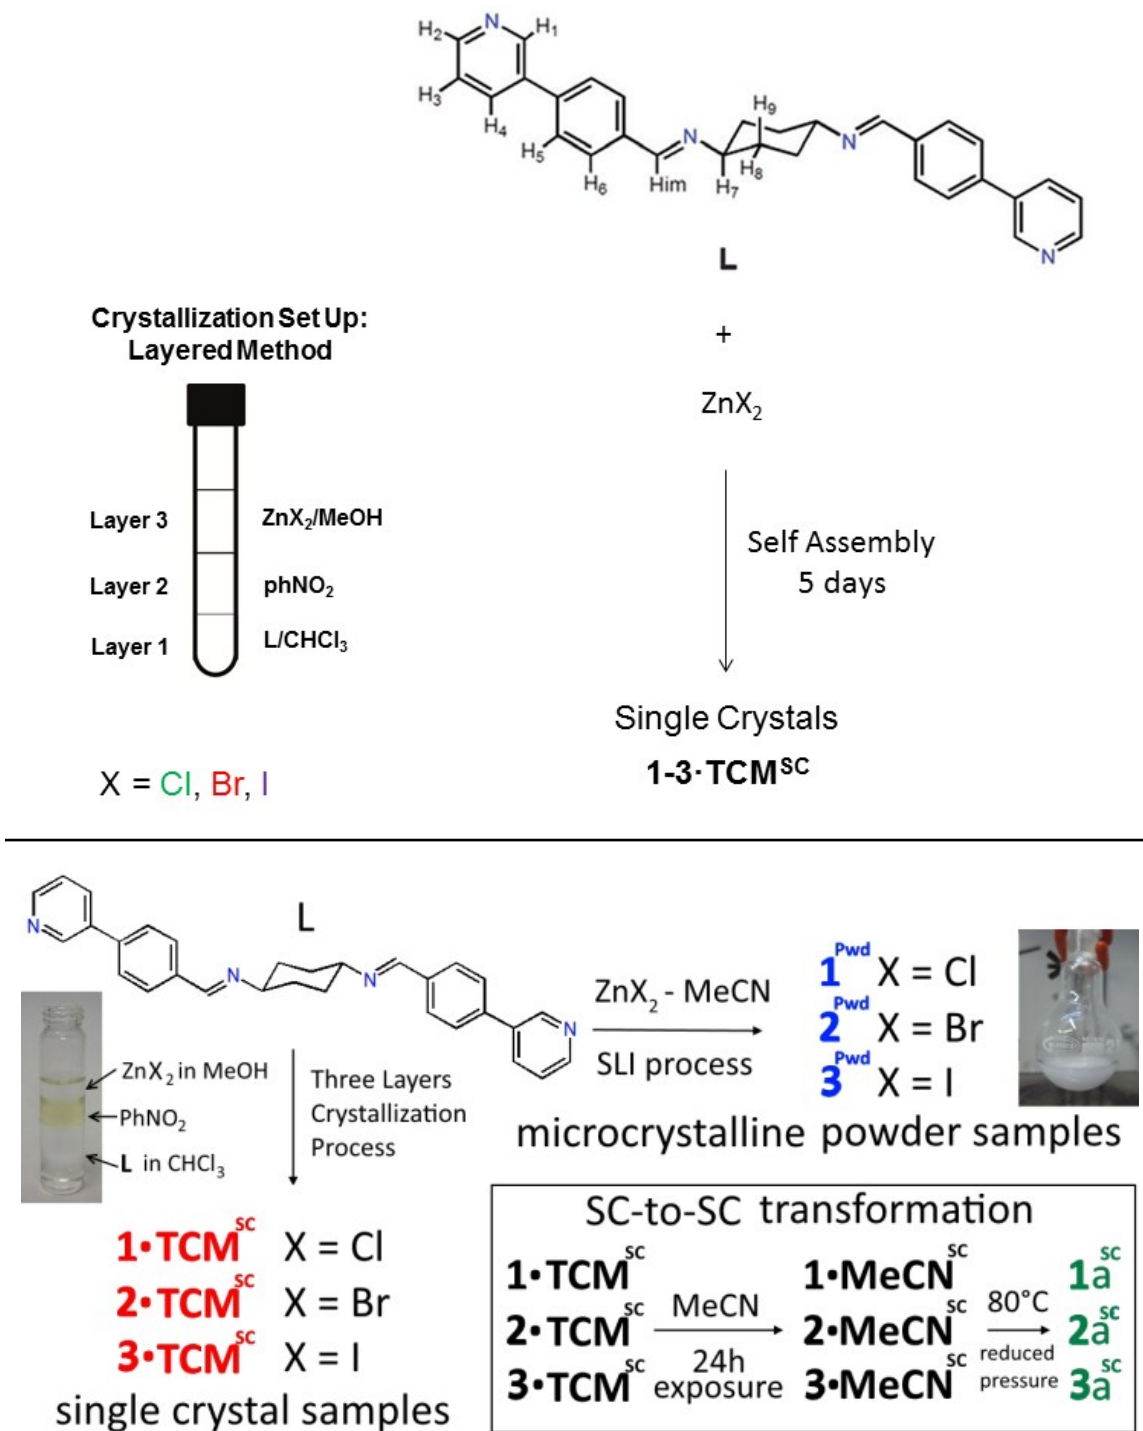

**Figure S7.** (Top) Single crystal preparation of **1-3·TCM<sup>SC</sup>**. (Bottom) Summary explaining the two methods (i.e., slow crystallization (layering) and fast crystallization (solid liquid interface reaction) carried out in this work. Inset showing the SC-to-SC guest exchange reactions done.

## Synthesis of crystals $2 \cdot \text{TCM}^{\text{SC}}$ with ligand **L**.

Single crystals of  $2 \cdot \text{TCM}^{\text{SC}}$  were prepared out using the triple layering method by treating **L** (40 mg) with  $\text{ZnBr}_2$  (20.27 mg) following the procedure used to crystallize  $1 \cdot \text{TCM}^{\text{SC}}$ . The bottom layer was a chloroform solution of **L** onto which a layer of nitrobenzene (middle layer) was deposited dropwise. The upper layer consists on a methanol solution of  $\text{ZnBr}_2$ . Prism-like single crystals were obtained after one week. The crystal structure of  $2 \cdot \text{TCM}^{\text{SC}}$  has been solved using single crystal X-ray diffraction. The coordination polymer crystallizes in the orthorhombic system in the *Pnna* space group and have similar lattice parameters (Table S1), and therefore are isostructural to the chloride polymer  $1 \cdot \text{TCM}^{\text{SC}}$ . The crystal structure of  $2 \cdot \text{TCM}^{\text{SC}}$  is shown in Figure S8.

**Table S1.** Crystallographic data regarding the lattice parameters of  $2 \cdot \text{TCM}^{\text{SC}}$ .

| Crystal data for     | $2 \cdot \text{TCM}^{\text{SC}}$                                                   |                        |
|----------------------|------------------------------------------------------------------------------------|------------------------|
| Empirical formula    | $\text{C}_{30.75} \text{H}_{28.75} \text{N}_4 \text{Br}_2 \text{Cl}_2 \text{Zn}_1$ |                        |
| Formula weight       | 750.42 g/mol                                                                       |                        |
| Temperature          | 100 K                                                                              |                        |
| Crystal system       | Orthorhombic                                                                       |                        |
| Space group          | <i>Pnna</i>                                                                        |                        |
| Unit cell dimensions | $a = 14.6557(10) \text{ \AA}$                                                      | $\alpha = 90.00^\circ$ |
|                      | $b = 22.6968(16) \text{ \AA}$                                                      | $\beta = 90.00^\circ$  |
|                      | $c = 10.1625(8) \text{ \AA}$                                                       | $\gamma = 90.00^\circ$ |
| Volume               | $3380.4(4) \text{ \AA}^3$                                                          |                        |
| Z                    | 4                                                                                  |                        |
| R- Factor (%)        | 6.19                                                                               |                        |
| Density (calculated) | $1.474 \text{ g/cm}^3$                                                             |                        |

The CCDC number for  $2 \cdot \text{TCM}^{\text{SC}}$ : **1497288**.

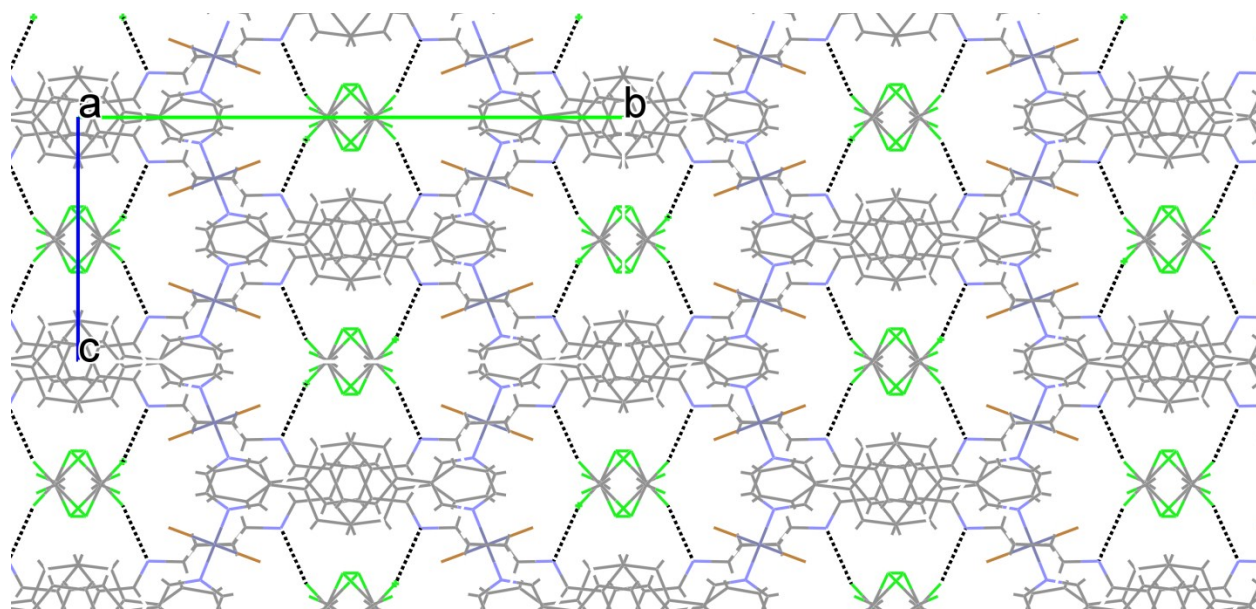

**Figure S8.** Single crystal data of **2·TCM<sup>SC</sup>** measured at 100K.

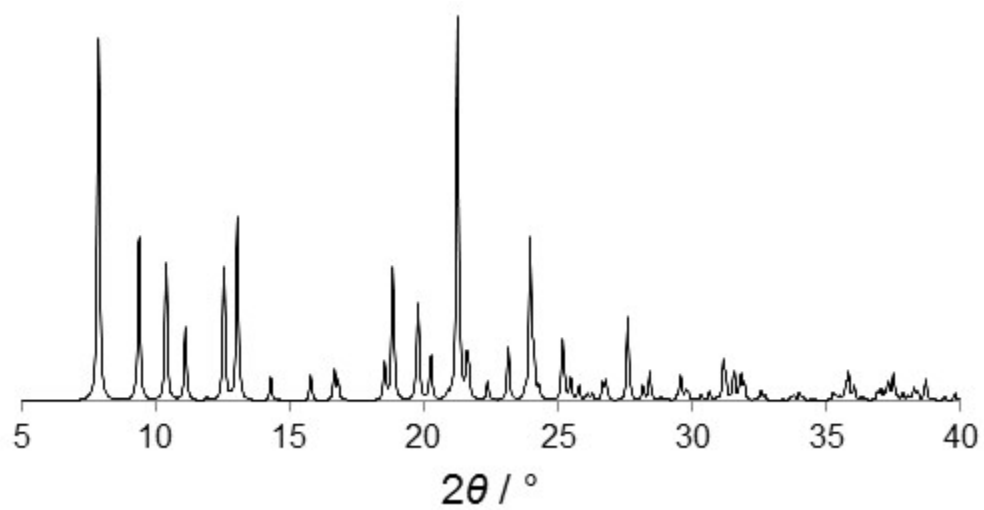

**Figure S9.** Simulated XRD obtained from the single crystal **2·TCM<sup>SC</sup>**.

## Synthesis of crystals $3 \cdot \text{TCM}^{\text{SC}}$ with ligand **L**.

Single crystals of  $3 \cdot \text{TCM}^{\text{SC}}$  were prepared out using the triple layering method by treating **L** (40 mg) with  $\text{ZnI}_2$  (26.56 mg) following the procedure used to crystallize  $1 \cdot \text{TCM}^{\text{SC}}$ . The bottom layer was a chloroform solution of **L** onto which a layer of nitrobenzene (middle layer) was deposited dropwise. The upper layer was a methanol solution of  $\text{ZnI}_2$ . Prism-like single crystals were obtained after one week. The crystal structure of  $3 \cdot \text{TCM}^{\text{SC}}$  has been solved using single crystal X-ray diffraction. The coordination polymer crystallizes in the orthorhombic system in the *Pnna* space group and have similar lattice parameters (Table S2), and therefore are isostructural to the chloride polymers  $1 \cdot \text{TCM}^{\text{SC}}$  and  $2 \cdot \text{TCM}^{\text{SC}}$ . The crystal structure of  $3 \cdot \text{TCM}^{\text{SC}}$  is shown in Figure S10.

**Table S2.** Crystallographic data regarding the lattice parameters of  $3 \cdot \text{TCM}^{\text{SC}}$ .

| Crystal data for     | $3 \cdot \text{TCM}^{\text{SC}}$                                                      |                        |
|----------------------|---------------------------------------------------------------------------------------|------------------------|
| Empirical formula    | $\text{C}_{30.76} \text{H}_{28.76} \text{N}_4 \text{I}_2 \text{Cl}_{2.5} \text{Zn}_1$ |                        |
| Formula weight       | 862.12 g/mol                                                                          |                        |
| Temperature          | 100 K                                                                                 |                        |
| Crystal system       | Orthorhombic                                                                          |                        |
| Space group          | <i>Pnna</i>                                                                           |                        |
| Unit cell dimensions | $a = 14.4863(13) \text{ \AA}$                                                         | $\alpha = 90.00^\circ$ |
|                      | $b = 22.1482(19) \text{ \AA}$                                                         | $\beta = 90^\circ$     |
|                      | $c = 11.0890(11) \text{ \AA}$                                                         | $\gamma = 90.00^\circ$ |
| Volume               | $3557.9(6) \text{ \AA}^3$                                                             |                        |
| Z                    | 4                                                                                     |                        |
| R- Factor (%)        | 5.58                                                                                  |                        |
| Density (calculated) | $1.609 \text{ g/cm}^3$                                                                |                        |

The CCDC number for  $3 \cdot \text{TCM}^{\text{SC}}$ : **1497289**.

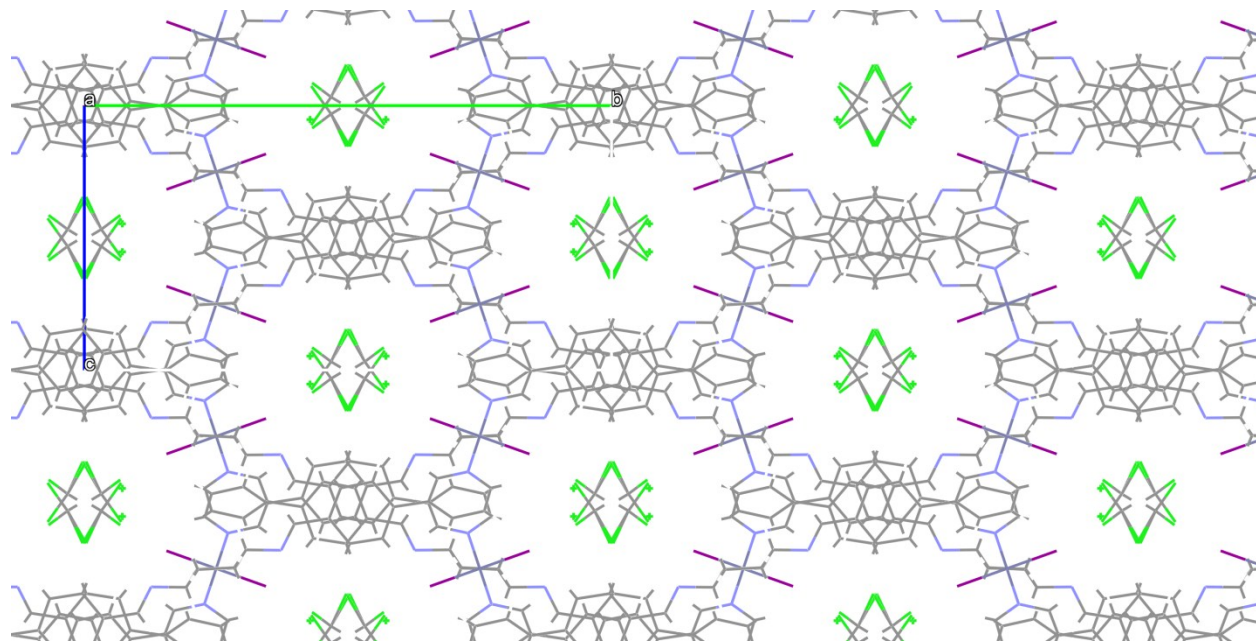

**Figure S10.** Single crystal data of **3·TCM<sup>SC</sup>** viewed along the *a*-axis.

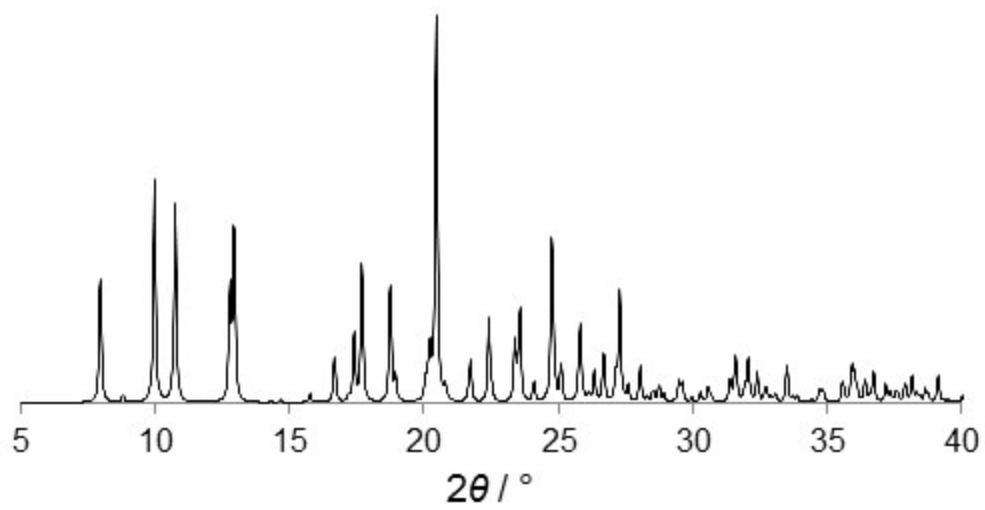

**Figure S11.** Simulated XRPD of **3·TCM<sup>SC</sup>**.

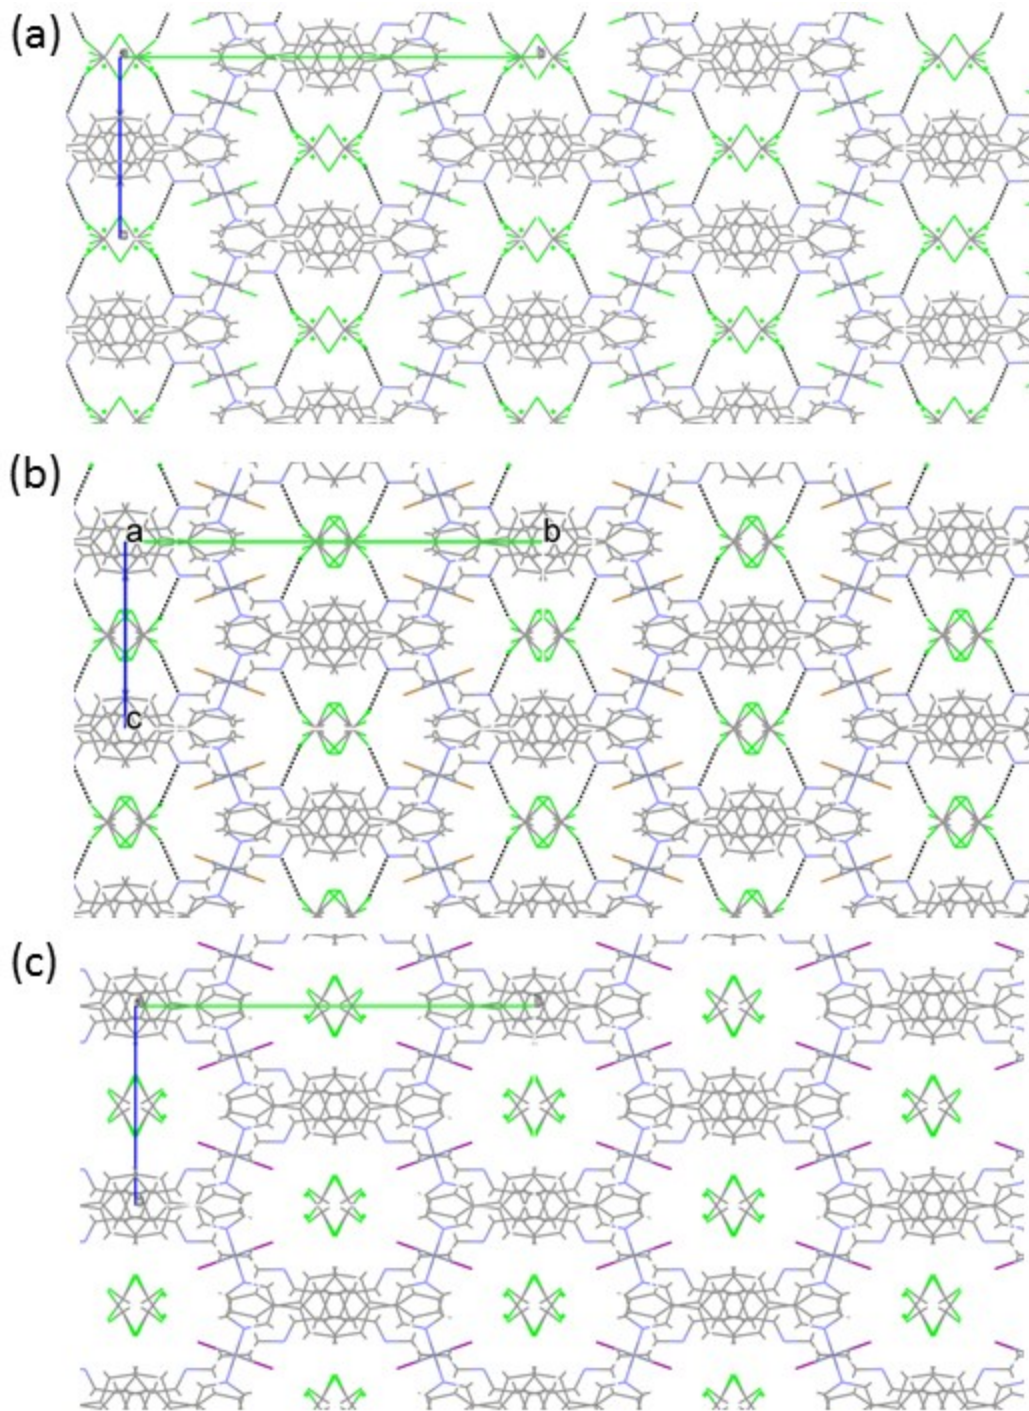

**Figure S12.** Crystal packing of  $1\cdot 3\cdot \text{TCM}^{\text{SC}}$  showing the hydrogen bonding interactions between TCM and the iminic N atoms as dashed black lines.

### Single crystal structure of $1 \cdot \text{MeCN}^{\text{SC}}$ .

Single crystal structure of  $1 \cdot \text{MeCN}^{\text{SC}}$  after the guest exchange reaction in  $1 \cdot \text{TCM}^{\text{SC}}$ , where TCM is replaced by MeCN to give  $1 \cdot \text{TCM}^{\text{SC}}$ , the lattice parameters are:  $a = 14.7485(14) \text{ \AA}$ ;  $b = 22.317(2) \text{ \AA}$ ;  $c = 10.4570(11) \text{ \AA}$ ,  $\alpha = \beta = \gamma = 90.00^\circ$   $V = 3441.8(6) \text{ \AA}^3$ . The Bravais lattice remains Orthorhombic and the space group is maintained to  $Pnna$ . The data collection was carried out at 300 K. For further crystallographic information see the attached checkCIF files at the end of document and the CIF files. The CCDC number for  $1 \cdot \text{MeCN}^{\text{SC}}$ : **1507642**.

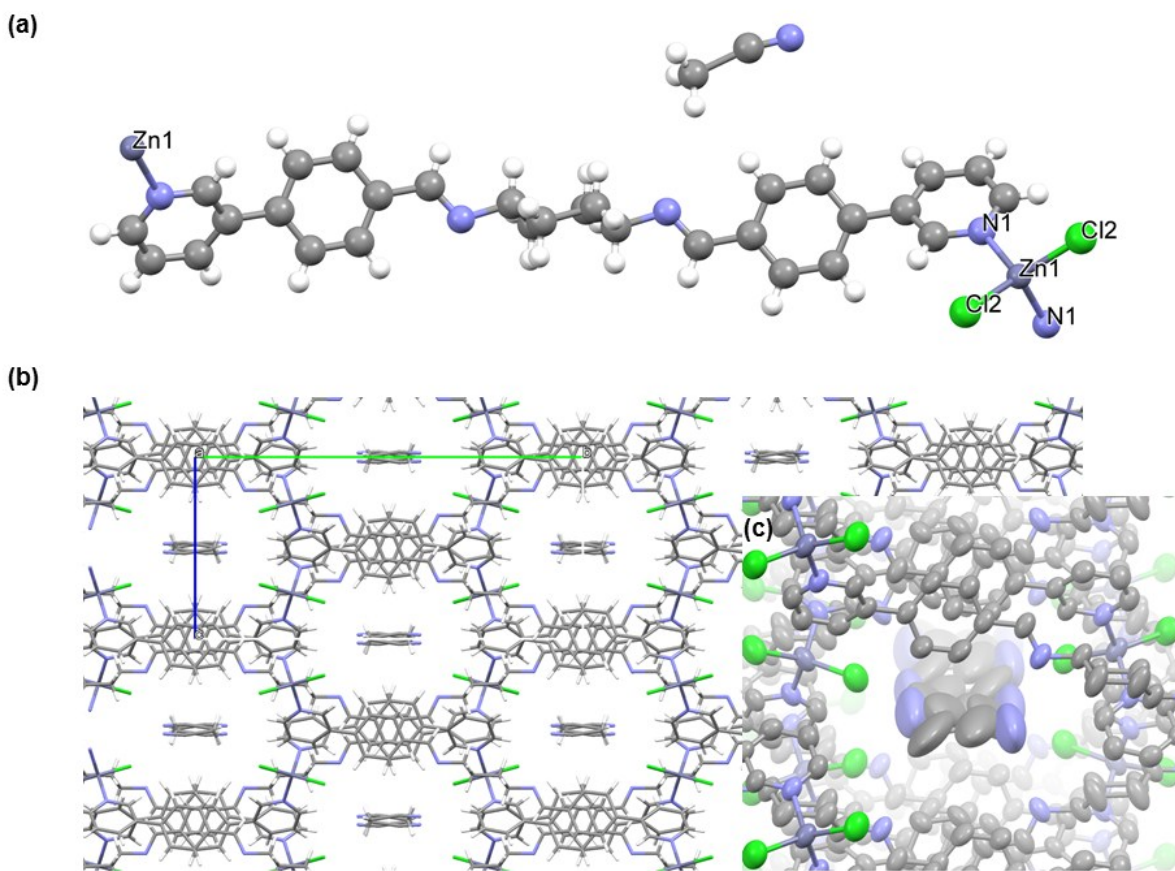

**Figure S13.** Crystal structure of  $1 \cdot \text{MeCN}^{\text{SC}}$  obtained after SC-to-SC according to Figure S6. Inset: view of the MeCN guest molecule with the displacement ellipsoids showing that the vibration is along the channel direction.

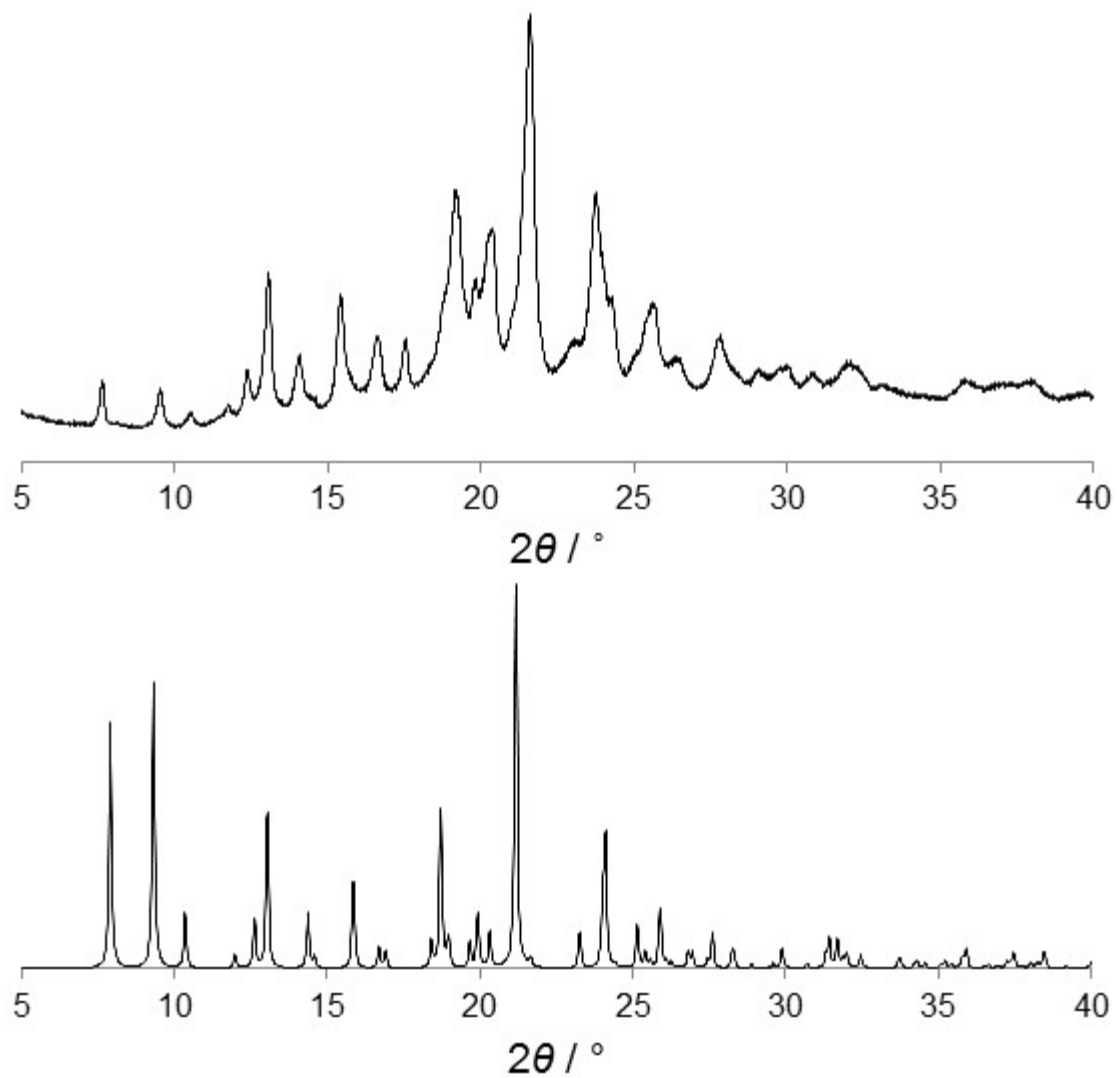

**Figure S14.** Experimental SLI of  $\text{ZnCl}_2$  in MeCN. Simulated after guest exchange of  $\mathbf{1} \cdot \text{TCM}^{\text{SC}}$  for MeCN to give  $\mathbf{1} \cdot \text{MeCN}^{\text{SC}}$ .



### Single crystal structure of $2 \cdot \text{MeCN}^{\text{SC}}$ .

Single crystal structure of  $2 \cdot \text{MeCN}^{\text{SC}}$  after the guest exchange reaction in  $2 \cdot \text{TCM}^{\text{SC}}$ , where TCM is replaced by MeCN to give  $2 \cdot \text{TCM}^{\text{SC}}$ , the lattice parameters are:  $a = 14.8955(11) \text{ \AA}$ ;  $b = 22.5127(17) \text{ \AA}$ ;  $c = 10.2599(7) \text{ \AA}$ ,  $\alpha = \beta = \gamma = 90.00^\circ$   $V = 3440.5(4) \text{ \AA}^3$ . The Bravais lattice remains Orthorhombic and the space group is maintained to  $Pnna$ . The data collection was carried out at 300 K. For further crystallographic information see the attached checkCIF files at the end of document and the CIF files. The CCDC number for  $2 \cdot \text{MeCN}^{\text{SC}}$ : **1507643**

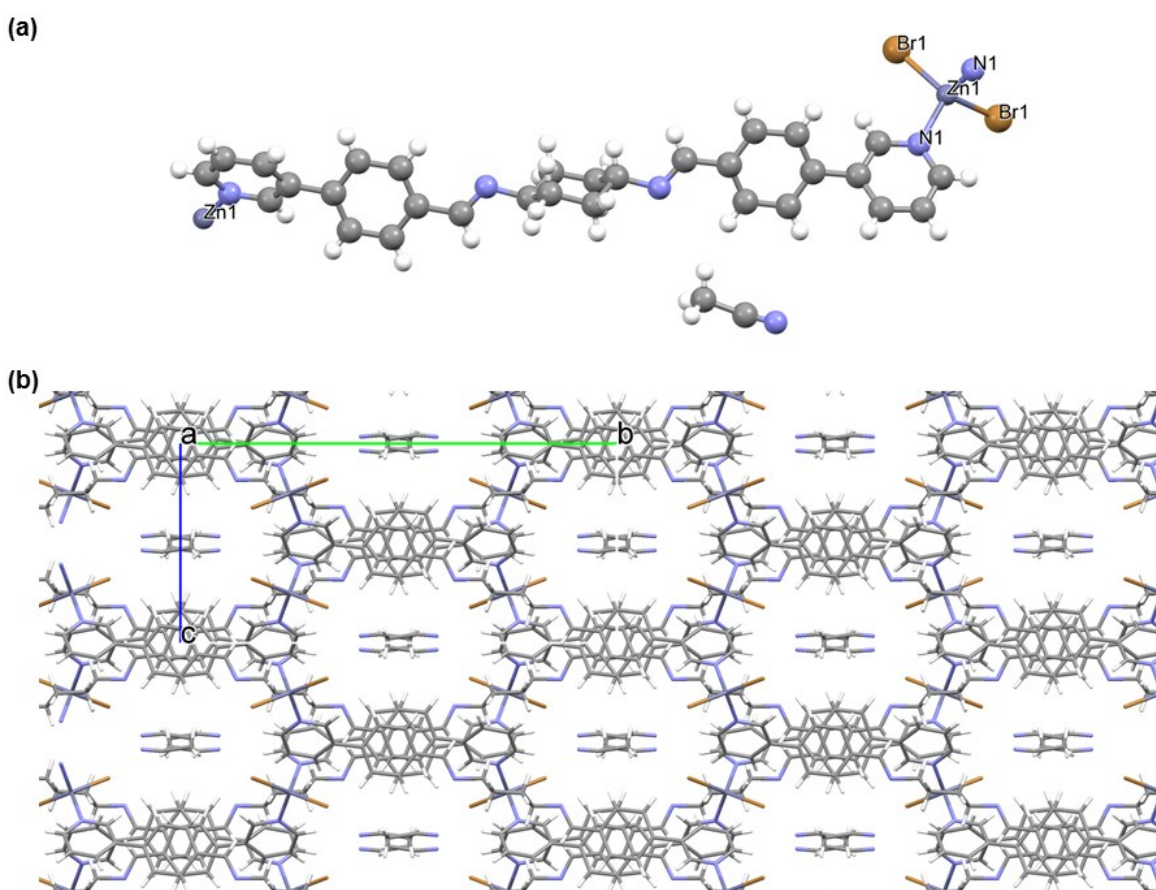

**Figure S15.** Crystal structure of  $2 \cdot \text{MeCN}^{\text{SC}}$  obtained after SC-to-SC according to Figure S6.

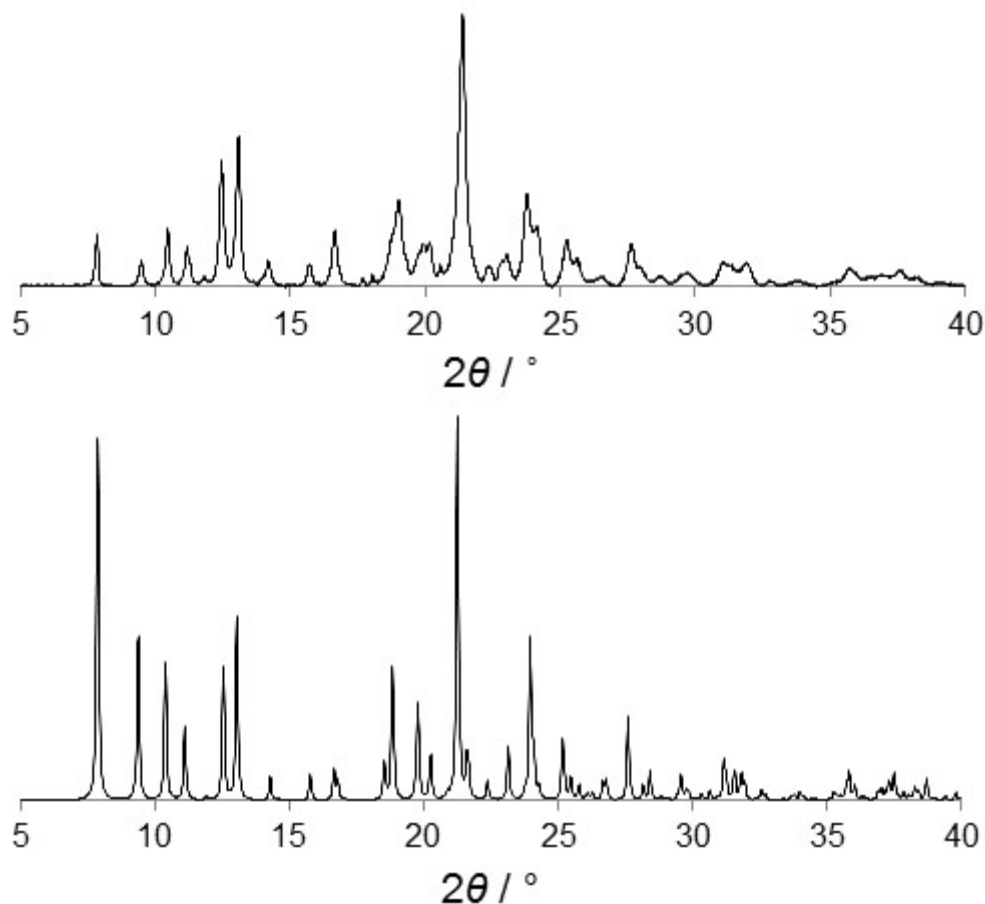

**Figure S16.** Experimental SLI of  $\text{ZnBr}_2$  in MeCN. Simulated after guest exchange of  $2 \cdot \text{TCM}^{\text{SC}}$  for MeCN to give  $2 \cdot \text{MeCN}^{\text{SC}}$ .

### Single crystal structure of $3 \cdot \text{MeCN}^{\text{SC}}$ .

Single crystal structure of  $3 \cdot \text{MeCN}^{\text{SC}}$  after the guest exchange reaction in  $3 \cdot \text{TCM}^{\text{SC}}$ , where TCM is replaced by MeCN to give  $3 \cdot \text{TCM}^{\text{SC}}$ , the lattice parameters are:  $a = 15.077(3) \text{ \AA}$ ;  $b = 22.570(4) \text{ \AA}$ ;  $c = 10.412(2) \text{ \AA}$ ,  $\alpha = \beta = \gamma = 90.00^\circ$   $V = 3543.2(11) \text{ \AA}^3$ . The Bravais lattice remains Orthorhombic and the space group is maintained to  $Pnna$ . The data collection was carried out at 300 K. . For further crystallographic information see the attached checkCIF files at the end of document and the CIF files. The CCDC number for  $3 \cdot \text{MeCN}^{\text{SC}}$ : **1507644**

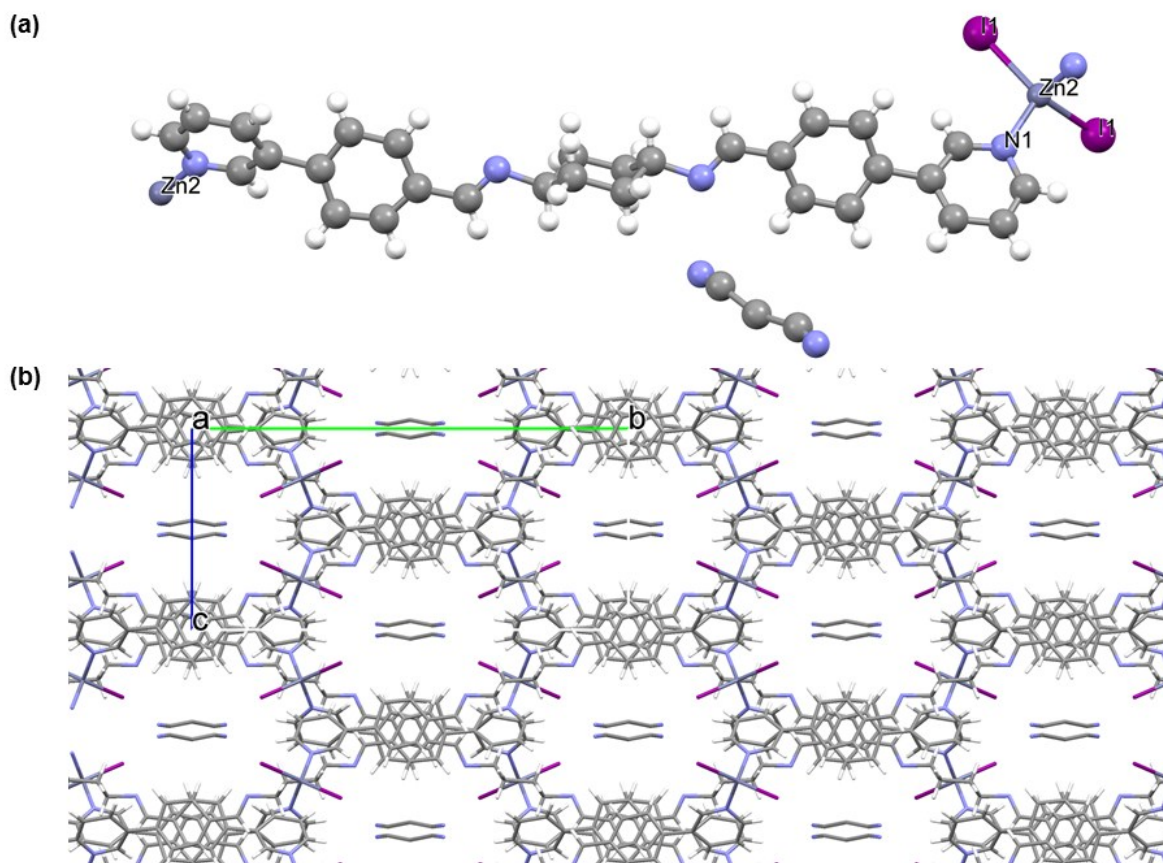

**Figure S17.** Crystal structure of  $3 \cdot \text{MeCN}^{\text{SC}}$  obtained after SC-to-SC according to Figure S6.

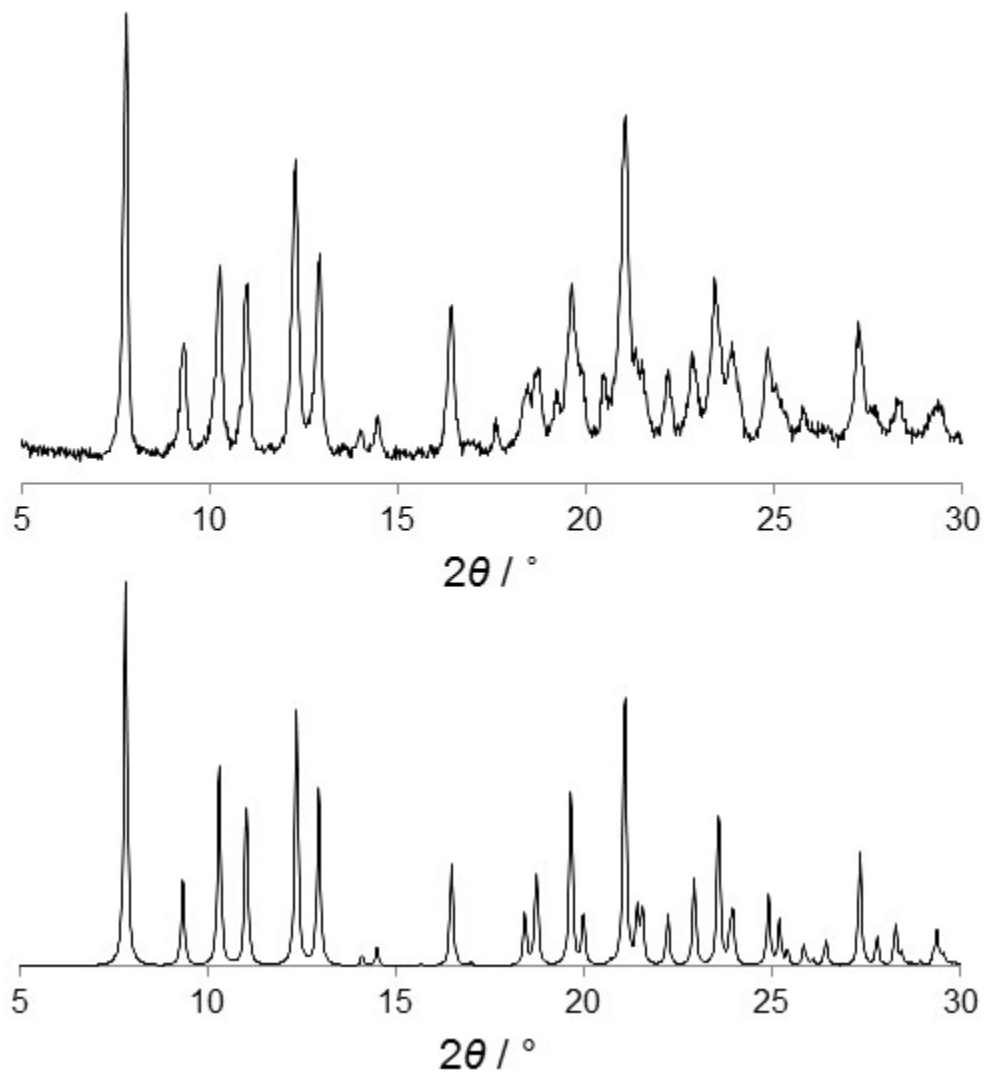

**Figure S18.** (Top) Experimental XRPD pattern obtained using the solid liquid interface method by adding  $\text{ZnI}_2$  in MeOH to a suspension of **L** in MeCN vigorously stirred. (Bottom) Simulated XRPD pattern obtained after a SC-to-SC guest exchange of  $\mathbf{3}\cdot\text{TCM}^{\text{SC}}$  for MeCN to give  $\mathbf{3}\cdot\text{MeCN}^{\text{SC}}$ . The good match between both XRPD patterns confirms that MeCN replaced the original TCM guest molecule.

**Gas solid experiments using microcrystalline sample of  $3 \cdot \text{MeCN}^{\text{Pwd}}$  obtained by the solid liquid interface method.**

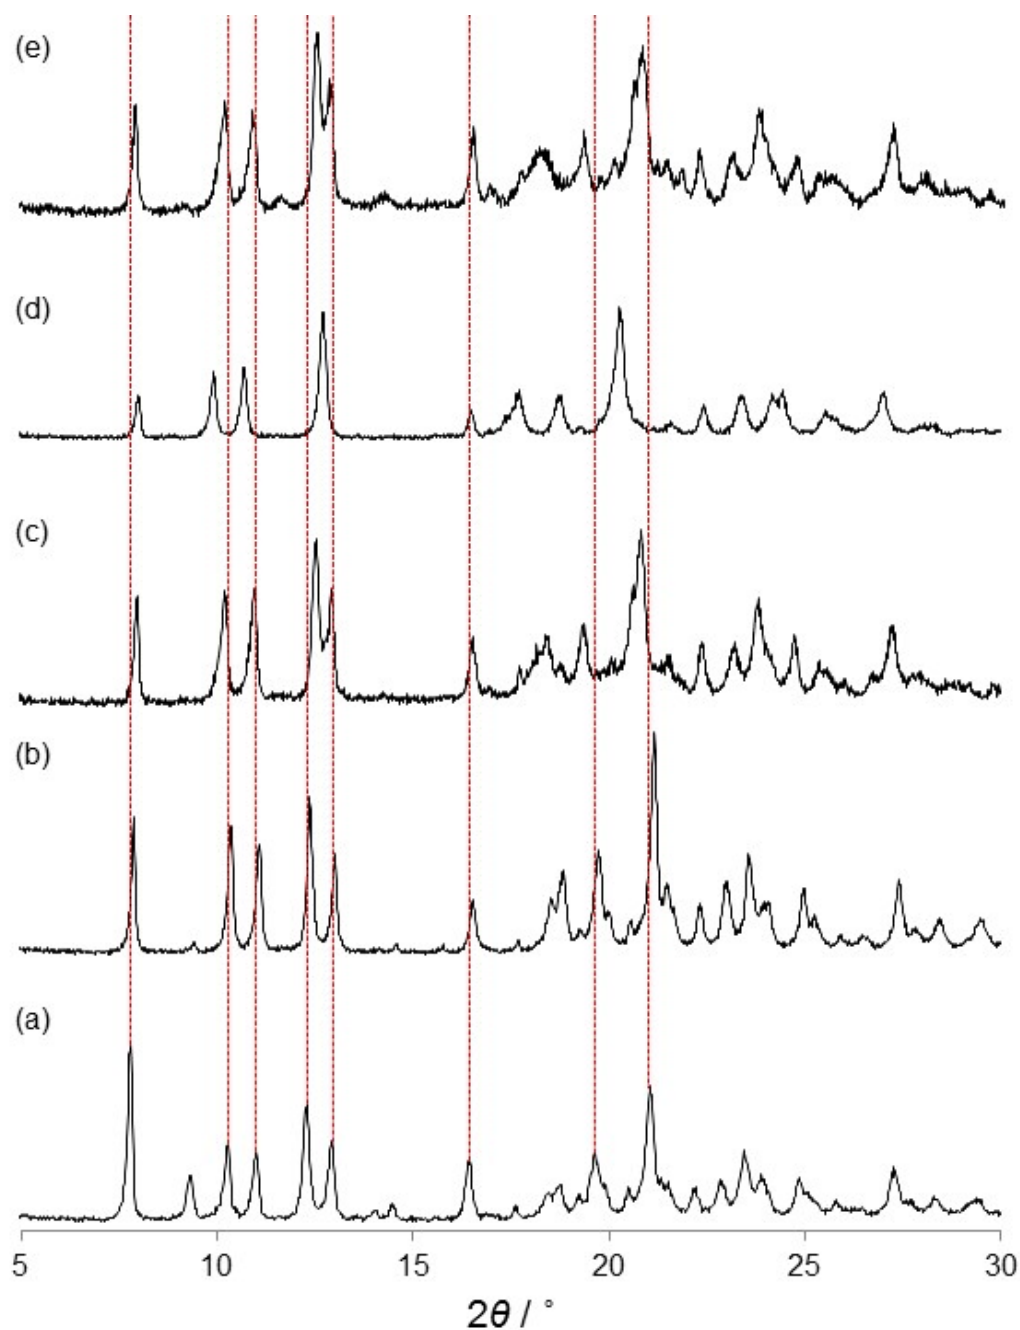

**Figure S19.** Experimental XRPD diffraction patterns measured at room temperature of  $3 \cdot \text{MeCN}^{\text{PwD}}$  (a) exposed to DCE to give  $3 \cdot \text{DCE}^{\text{PwD}}$  (b), TCE to give  $3 \cdot \text{TCE}^{\text{PwD}}$  (c), TCM to give  $3 \cdot \text{TCM}^{\text{PwD}}$  (d) and DCM to give  $3 \cdot \text{DCM}^{\text{PwD}}$  (e). It is clear that there is an anisotropic peak shift corroborating the structural adaptation to the different guest molecules and that the structure is maintained after the guest exchange.

## Single-crystal-to-single-crystal reaction to include TCE in single crystals of **1·TCM<sup>SC</sup>**.

The crystal structure corresponding to the SCSC guest exchange reaction by exposing a single crystal of **1·TCM<sup>SC</sup>** to vapors of 1,1,2-trichloroethylene (TCE) to give the **1·TCE<sup>SC</sup>** coordination polymer.

**Table S3.** Crystallographic data regarding the lattice parameters of **1·TCE<sup>SC</sup>**.

| Crystal data for     | <b>1·TCE<sup>SC</sup></b>                                                      |                        |
|----------------------|--------------------------------------------------------------------------------|------------------------|
| Empirical formula    | C <sub>32</sub> H <sub>29</sub> N <sub>4</sub> Cl <sub>5</sub> Zn <sub>1</sub> |                        |
| Formula weight       | 712.22 g/mol                                                                   |                        |
| Temperature          | 200 K                                                                          |                        |
| Crystal system       | Orthorhombic                                                                   |                        |
| Space group          | <i>Pnna</i>                                                                    |                        |
| Unit cell dimensions | $a = 14.7372(11) \text{ \AA}$                                                  | $\alpha = 90.00^\circ$ |
|                      | $b = 22.7121(16) \text{ \AA}$                                                  | $\beta = 90^\circ$     |
|                      | $c = 9.9658(8) \text{ \AA}$                                                    | $\gamma = 90.00^\circ$ |
| Volume               | 3335.7(4)Å <sup>3</sup>                                                        |                        |
| Z                    | 4                                                                              |                        |
| R- Factor (%)        | 8.39                                                                           |                        |
| Density (calculated) | 1.418 g/cm <sup>3</sup>                                                        |                        |

The CCDC number for **1·TCE<sup>SC</sup>**: **1497290**.

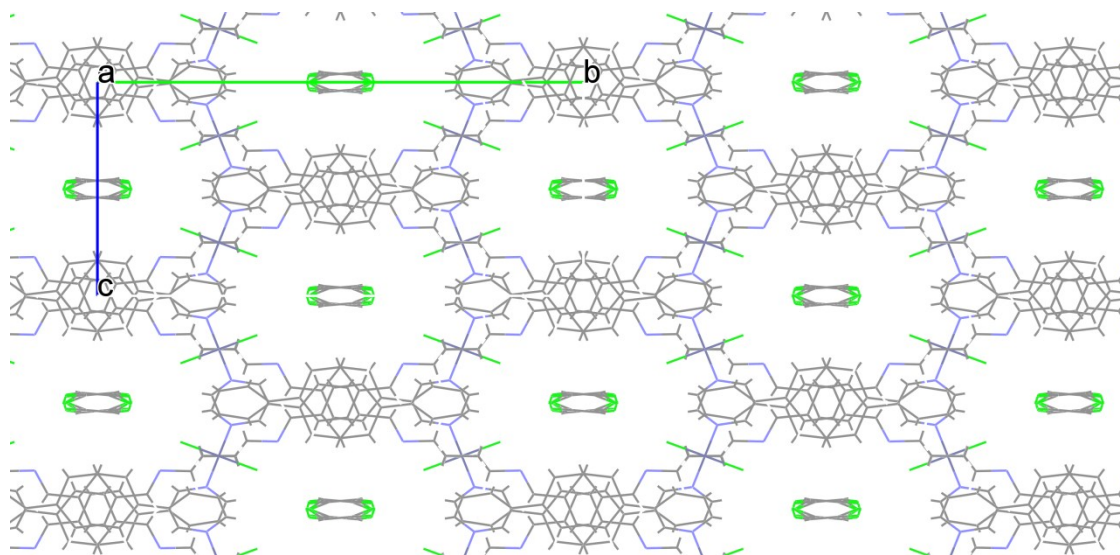

**Figure S20.** Crystal packing of **1·TCE<sup>SC</sup>** showing the inclusion of TCE guest molecules in the 1D channels.

## NMR analysis

A certain weighted amount of the powder samples (ca. 3-5 mg) is introduced into a NMR tube. 500  $\mu\text{L}$  of DMSO- $d_6$  and 5  $\mu\text{L}$  of a 4.6mM solution of nitromethane in DMSO- $d_6$  are added. The sample is then heated till complete dissolution to ensure complete solvent release from the coordination polymer. Spectra were recorded at 305 K on a Bruker Avance 400 (400 MHz, SW= 14 ppm, NS = 16). In order to check the effect of heating on the resulting amount of volatile solvents detected, a control experiment was also performed avoiding the heating step. No significant difference was spotted, thus indicating that DMSO molecules can disrupt the CP structure and release all the solvent guest molecules at r.t.

Equation for the determination of the  $R$  factor by  $^1\text{H}$ -NMR analysis.  $R$  is defined as the molar ratio between the solvent guest molecules and  $\text{L}\cdot\text{ZnX}_2$  units ( $\text{X} = \text{Cl}, \text{Br}$  or  $\text{I}$ ).

$$R_{\text{solvent guest}} = \frac{\text{moles of solvent guest}}{\text{moles of } \text{L}\cdot\text{ZnX}_2 \text{ units}} =$$
$$= \frac{\text{Volume} \cdot [\text{solvent guest}]_{\text{NMR}}}{(\text{mg}_{\text{tot}} - \text{MW}_{\text{solvent guest}} \cdot \text{Volume} \cdot [\text{solvent guest}]_{\text{NMR}}) / \text{MF}_{\text{L}\cdot\text{ZnX}_2}}$$

Volume =; volume of the DMSO- $d_6$  used (500  $\mu\text{L}$  + 5  $\mu\text{L}$  of internal standard)

$[\text{solvent guest}]_{\text{NMR}}$  = concentration of the guest solvent as measured by  $^1\text{H}$ -NMR by comparison of the integral value of an internal standard (Nitromethane)

$\text{mg}_{\text{tot}}$  = total amount of material weighted

$\text{MW}_{\text{solvent guest}}$  = molecular weight of the solvent guest

$\text{MF}_{\text{L}\cdot\text{ZnX}_2 \text{ units}}$  = formula weight of the  $\text{L}\cdot\text{ZnX}_2$  unit

Equation for the determination of the  $S$  factor.  $S$  is defined as the ration between the  $R$  factors of two given solvents.

$$S_{\text{solvent1/solvent2}} = \frac{R_{\text{solvent1}}}{R_{\text{solvent2}}}$$

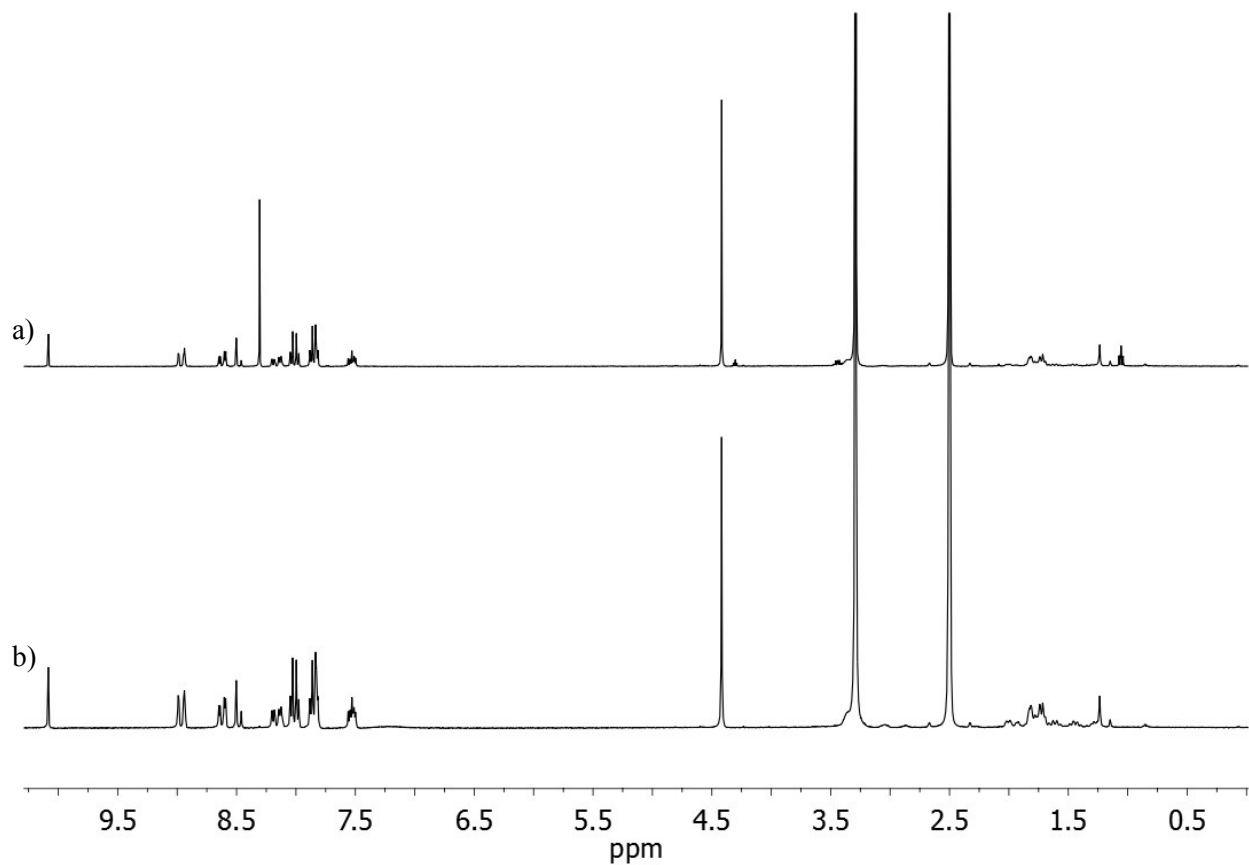

**Figure S21.**  $^1\text{H}$ -NMR characterization in  $\text{DMSO-d}_6$  of sample  $3^{\text{P}^{\text{wd}}}$  exposed to TCM vapors for 24h a) and b) after thermal treatment under reduced pressure ( $80^\circ\text{C}$  for 10 h).



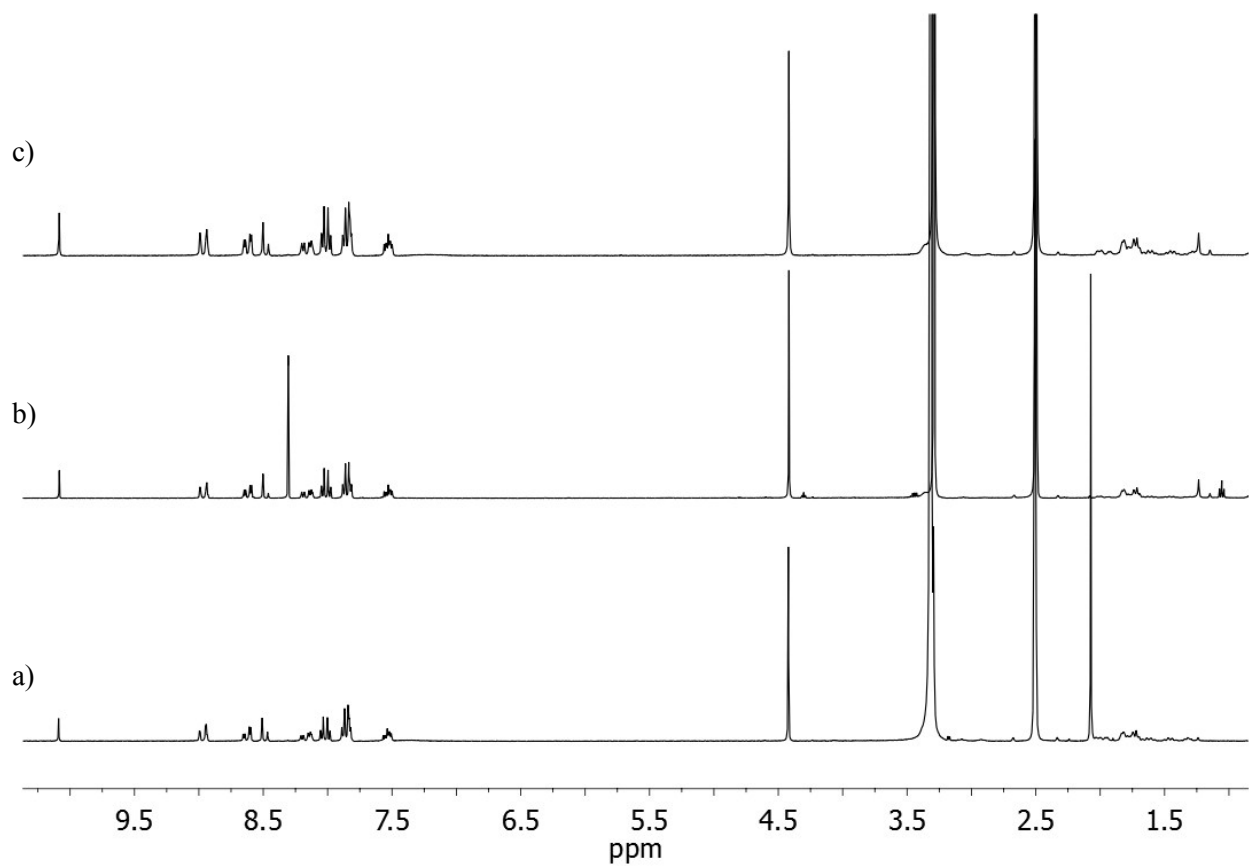

**Figure S22.** a) <sup>1</sup>H-NMR characterization in DMSO-d<sub>6</sub> of **3<sup>PwD</sup>**; b) after exposure for 24h to TCM vapors and c) after thermal treatment under reduced pressure (80°C for 10 h).

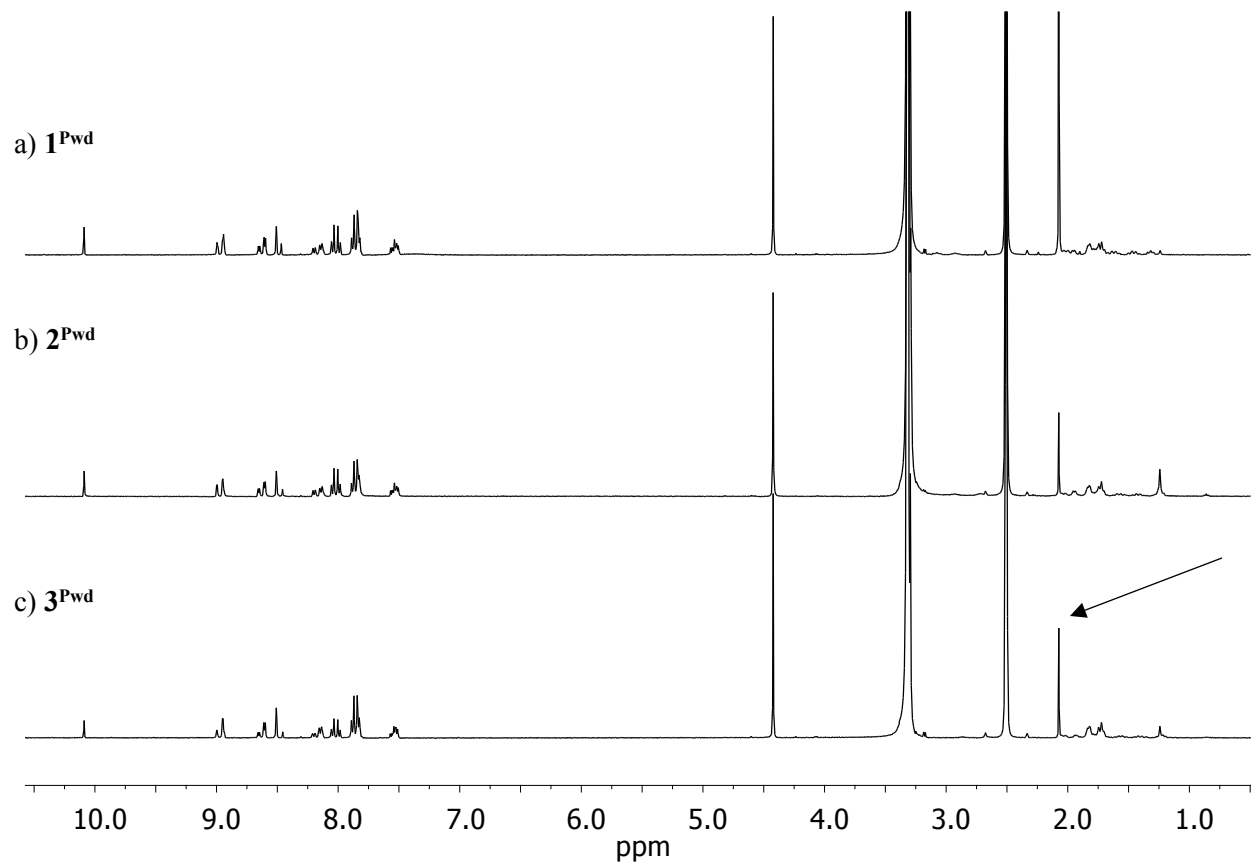

**Figure S23.**  $^1\text{H-NMR}$  characterization in  $\text{DMSO-d}_6$  of materials  $1\text{-}3^{\text{Pwd}}$ , as synthesized, showing the presence of MeCN.

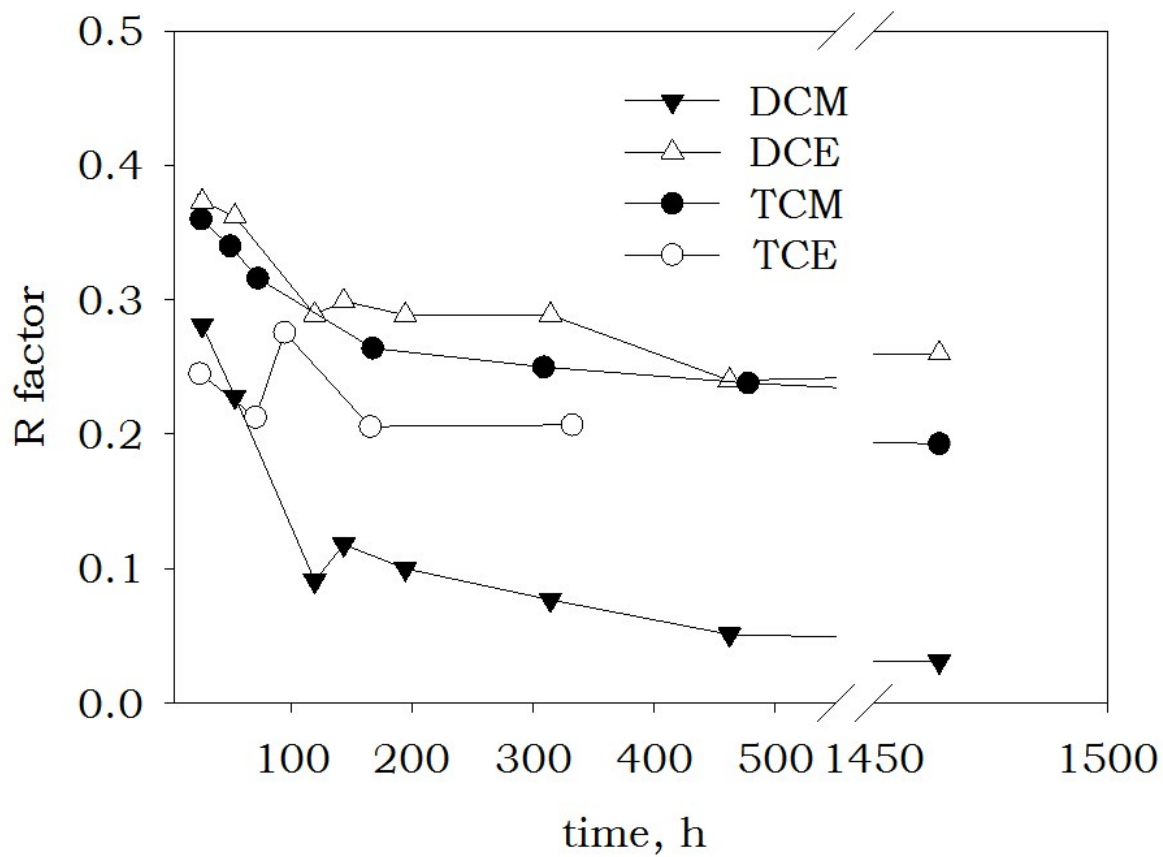

**Figure S24.** Plot of the *R* factor over time for various solvents in samples of **1<sup>Pwd</sup>** as measured by <sup>1</sup>H-NMR. Samples were exposed to each solvent for 24 h and then left in ambient condition. *R* factors were calculated by using nitromethane as internal standard.

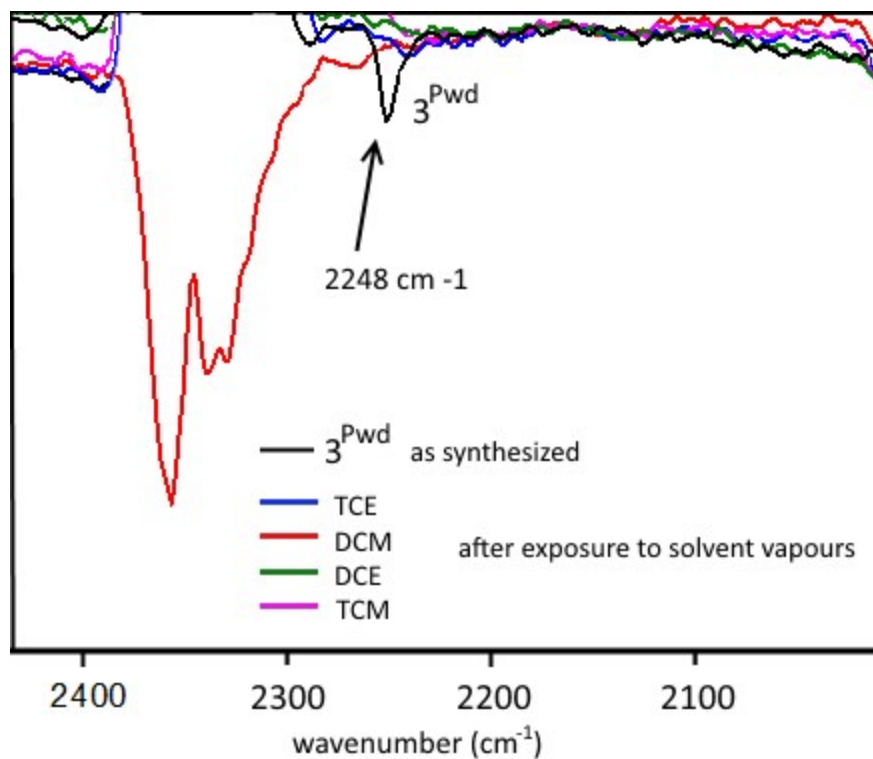

**Figure S25.** Plot of the ATR-FT-IR spectra in the 2450-2000 cm<sup>-1</sup> region of a) **3<sup>PwD</sup>** as synthesized and of the material exposed to vapours of TCE, DCE, DCM and TCM. The absorption peak at 2248 cm<sup>-1</sup> corresponds to included MeCN molecules.

# checkCIF (basic structural check) running

---

---

Checking for embedded fcf data in CIF ...

Found embedded fcf data in CIF. Extracting fcf data from uploaded CIF, please wait . .

---

Structure factors have been supplied for datablock(s) 2TCM\_100K

THIS REPORT IS FOR GUIDANCE ONLY. IF USED AS PART OF A REVIEW PROCEDURE FOR PUBLICATION, IT SHOULD NOT REPLACE THE EXPERTISE OF AN EXPERIENCED CRYSTALLOGRAPHIC REFEREE.

No syntax errors found.

Please wait while processing ....

[Structure factor report](#)

[CIF dictionary](#)

[Interpreting this report](#)

## Datablock: 2TCM\_100K

---

Bond precision: C-C = 0.0098 Å Wavelength=1.54178

Cell: a=14.6557 (10) b=22.6968 (16) c=10.1625 (8)

alpha=90 beta=90 gamma=90

Temperature: 100 K

|                        | Calculated                       | Reported                    |
|------------------------|----------------------------------|-----------------------------|
| Volume                 | 3380.4 (4)                       | 3380.4 (4)                  |
| Space group            | P n n a                          | P n n a                     |
| Hall group             | -P 2a 2bc                        | -P 2a 2bc                   |
| Moiety formula         | C30 H28 Br2 N4 Zn, 0.68(C H C13) | ?                           |
| Sum formula            | C30.68 H28.68 Br2 Cl2.04 N4 Zn   | C30.75 H28.75 Br2 Cl2 N4 Zn |
| Mr                     | 750.92                           | 750.42                      |
| Dx, g cm <sup>-3</sup> | 1.475                            | 1.474                       |

|            |              |              |
|------------|--------------|--------------|
| Z          | 4            | 4            |
| Mu (mm-1)  | 5.454        | 5.425        |
| F000       | 1501.8       | 1501.0       |
| F000'      | 1495.68      |              |
| h, k, lmax | 17, 26, 12   | 17, 26, 12   |
| Nref       | 2938         | 2841         |
| Tmin, Tmax | 0.624, 0.722 | 0.623, 0.753 |
| Tmin'      | 0.554        |              |

Correction method= # Reported T Limits: Tmin=0.623  
Tmax=0.753 AbsCorr = MULTI-SCAN

Data completeness= 0.967          Theta(max)= 65.954

R(reflections)= 0.0619( 2205)          wR2(reflections)= 0.1980( 2841)

S = 1.091          Npar= 204

The following ALERTS were generated. Each ALERT has the format

**test-name\_ALERT\_alert-type\_alert-level.**

Click on the hyperlinks for more details of the test.

### ● Alert level B

[PLAT934\\_ALERT\\_3\\_B](#) Number of (Iobs-Icalc)/SigmaW > 10 Outliers ....          2 Check

### ● Alert level C

[PLAT041\\_ALERT\\_1\\_C](#) Calc. and Reported SumFormula    Strings Differ    Please Check  
[PLAT077\\_ALERT\\_4\\_C](#) Unitcell contains non-integer number of atoms ..    Please Check  
[PLAT250\\_ALERT\\_2\\_C](#) Large U3/U1 Ratio for Average U(i,j) Tensor ....    2.1 Note  
[PLAT341\\_ALERT\\_3\\_C](#) Low Bond Precision on C-C Bonds .....    0.00975 Ang.  
[PLAT911\\_ALERT\\_3\\_C](#) Missing # FCF Refl Between THmin & STh/L= 0.592    97 Report  
[PLAT918\\_ALERT\\_3\\_C](#) Reflection(s) with I(obs) much Smaller I(calc) .    1 Check  
[PLAT971\\_ALERT\\_2\\_C](#) Check Calcd Residual Density 0.92A From Cl1S    1.57 eA-3  
[PLAT978\\_ALERT\\_2\\_C](#) Number C-C Bonds with Positive Residual Density    0 Note

### ● Alert level G

[FORMU01\\_ALERT\\_2\\_G](#) There is a discrepancy between the atom counts in the  
   \_chemical\_formula\_sum and the formula from the \_atom\_site\* data.

Atom count from \_chemical\_formula\_sum: C30.75 H28.75 Br2 Cl2 N4 Zn1

Atom count from the \_atom\_site data: C30.68 H28.68 Br2 Cl2.04 N4 Zn

[CELLZ01\\_ALERT\\_1\\_G](#) Difference between formula and atom\_site contents detected.

[CELLZ01\\_ALERT\\_1\\_G](#) WARNING: H atoms missing from atom site list. Is this intentional?

From the CIF: \_cell\_formula\_units\_Z 4

From the CIF: \_chemical\_formula\_sum C30.75 H28.75 Br2 Cl2 N4 Zn

TEST: Compare cell contents of formula and atom\_site data

| atom | Z*formula | cif sites | diff  |
|------|-----------|-----------|-------|
| C    | 123.00    | 122.72    | 0.28  |
| H    | 115.00    | 114.72    | 0.28  |
| Br   | 8.00      | 8.00      | 0.00  |
| Cl   | 8.00      | 8.16      | -0.16 |
| N    | 16.00     | 16.00     | 0.00  |
| Zn   | 4.00      | 4.00      | 0.00  |

|                         |           |                                                  |      |              |
|-------------------------|-----------|--------------------------------------------------|------|--------------|
| <a href="#">PLAT002</a> | ALERT 2 G | Number of Distance or Angle Restraints on AtSite | 4    | Note         |
| <a href="#">PLAT003</a> | ALERT 2 G | Number of Uiso or Uij Restrained non-H Atoms ... | 4    | Report       |
| <a href="#">PLAT004</a> | ALERT 5 G | Polymeric Structure Found with Maximum Dimension | 1    | Info         |
| <a href="#">PLAT068</a> | ALERT 1 G | Reported F000 Differs from Calcd (or Missing)... |      | Please Check |
| <a href="#">PLAT072</a> | ALERT 2 G | SHELXL First Parameter in WGHT Unusually Large   | 0.13 | Report       |
| <a href="#">PLAT176</a> | ALERT 4 G | The CIF-Embedded .res File Contains SADI Records | 1    | Report       |
| <a href="#">PLAT187</a> | ALERT 4 G | The CIF-Embedded .res File Contains RIGU Records | 1    | Report       |
| <a href="#">PLAT300</a> | ALERT 4 G | Atom Site Occupancy of <Cl1S is Constrained at   | 0.34 | Check        |

#### And 4 other PLAT300 Alerts

More ...

|                         |           |                                                 |     |       |
|-------------------------|-----------|-------------------------------------------------|-----|-------|
| <a href="#">PLAT302</a> | ALERT 4 G | Anion/Solvent Disorder ..... Percentage =       | 100 | Note  |
| <a href="#">PLAT789</a> | ALERT 4 G | Atoms with Negative _atom_site_disorder_group # | 5   | Check |
| <a href="#">PLAT860</a> | ALERT 3 G | Number of Least-Squares Restraints .....        | 21  | Note  |
| <a href="#">PLAT909</a> | ALERT 3 G | Percentage of Observed Data at Theta(Max) Still | 71  | %     |

0 **ALERT level A** = Most likely a serious problem - resolve or explain  
 1 **ALERT level B** = A potentially serious problem, consider carefully  
 8 **ALERT level C** = Check. Ensure it is not caused by an omission or oversight  
 19 **ALERT level G** = General information/check it is not something unexpected

4 ALERT type 1 CIF construction/syntax error, inconsistent or missing data  
 7 ALERT type 2 Indicator that the structure model may be wrong or deficient  
 6 ALERT type 3 Indicator that the structure quality may be low  
 10 ALERT type 4 Improvement, methodology, query or suggestion  
 1 ALERT type 5 Informative message, check

It is advisable to attempt to resolve as many as possible of the alerts in all categories. Often the minor alerts point to easily fixed oversights, errors and omissions in your CIF or refinement strategy, so attention to these fine details can be worthwhile. In order to resolve some of the more serious problems it may be necessary to carry out additional measurements or structure refinements. However, the purpose of your study may justify the reported deviations and the more serious of these should normally be commented upon in the discussion or experimental section of a paper or in the "special\_details" fields of the CIF. checkCIF was carefully designed to identify outliers and unusual parameters, but every test has its limitations and alerts that are not important in a particular case may appear. Conversely, the absence of alerts does not guarantee there are no aspects of the results needing attention. It is up to the individual to critically assess their own results and, if necessary, seek expert advice.

#### Publication of your CIF in IUCr journals

A basic structural check has been run on your CIF. These basic checks will be run on all CIFs submitted for publication in IUCr journals (*Acta Crystallographica*, *Journal of Applied Crystallography*, *Journal of Synchrotron Radiation*); however, if you intend to submit to *Acta Crystallographica Section*

C or E or IUCrData, you should make sure that full publication checks are run on the final version of your CIF prior to submission.

### Publication of your CIF in other journals

Please refer to the *Notes for Authors* of the relevant journal for any special instructions relating to CIF submission.

---

PLATON version of 11/08/2016; check.def file version of 04/08/2016

## Datablock 2TCM\_100K - ellipsoid plot

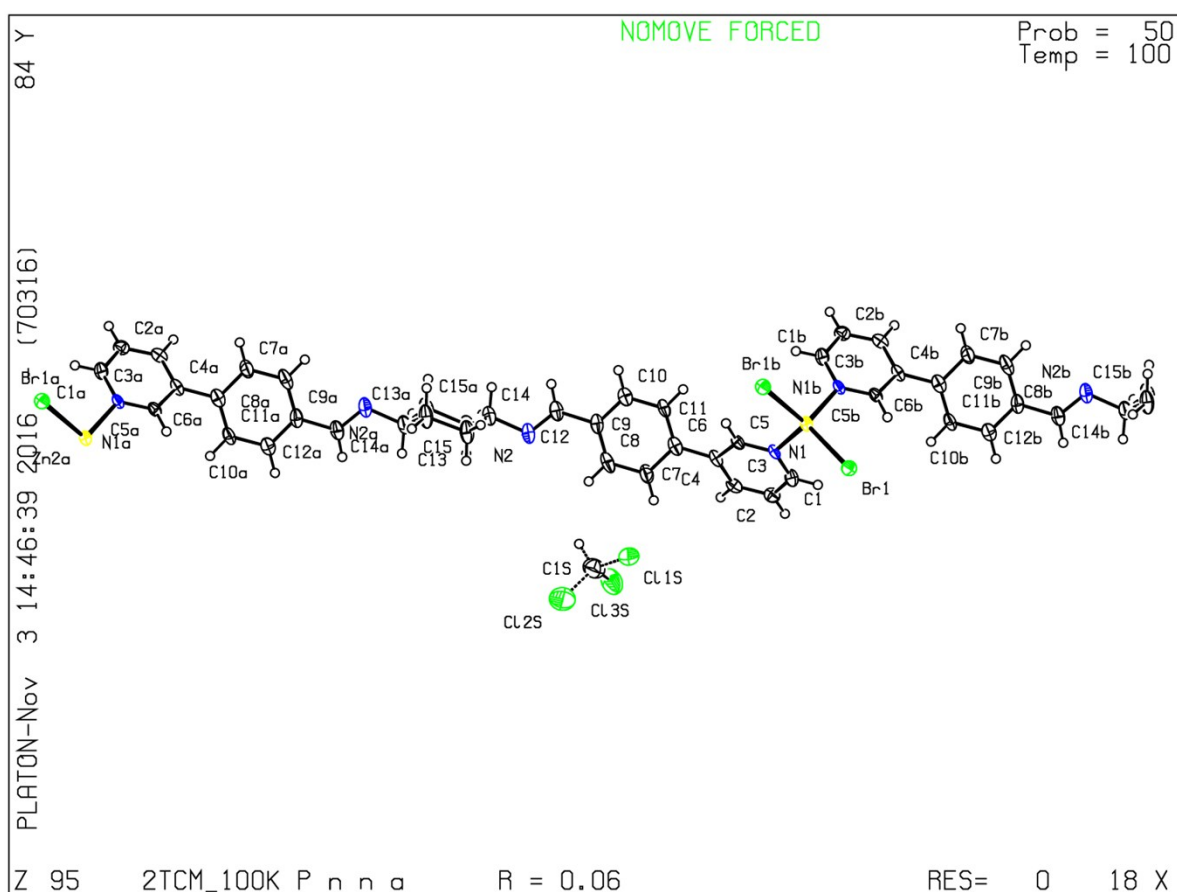

---

[Download CIF editor \(pubCIF\) from the IUCr](#)  
[Download CIF editor \(enCIFer\) from the CCDC](#)  
[Test a new CIF entry](#)



# checkCIF (basic structural check) running

---

Checking for embedded fcf data in CIF ...

Found embedded fcf data in CIF. Extracting fcf data from uploaded CIF, please wait . .

# checkCIF/PLATON (basic structural check)

---

Structure factors have been supplied for datablock(s) 3TCM\_100K

THIS REPORT IS FOR GUIDANCE ONLY. IF USED AS PART OF A REVIEW PROCEDURE FOR PUBLICATION, IT SHOULD NOT REPLACE THE EXPERTISE OF AN EXPERIENCED CRYSTALLOGRAPHIC REFEREE.

No syntax errors found.

Please wait while processing ....

[Structure factor report](#)

[CIF dictionary](#)

[Interpreting this report](#)

## Datablock: 3TCM\_100K

---

Bond precision: C-C = 0.0125 A Wavelength=1.54178

Cell: a=14.4863 (13) b=22.1482 (19) c=11.0890 (11)

alpha=90 beta=90 gamma=90

Temperature: 100 K

|                | Calculated                                    | Reported                            |
|----------------|-----------------------------------------------|-------------------------------------|
| Volume         | 3557.9 (6)                                    | 3557.9 (6)                          |
| Space group    | P n n a                                       | P n n a                             |
| Hall group     | -P 2a 2bc                                     | -P 2a 2bc                           |
| Moiety formula | C30 H28 I2 N4 Zn, 0.8(C H Cl3),<br>2 (Cl0.10) | ?                                   |
| Sum formula    | C30.80 H28.80 Cl2.60 I2 N4 Zn                 | C15.38 H14.38 Cl1.25 I N2<br>Zn0.50 |
| Mr             | 866.34                                        | 431.06                              |

|                        |              |              |
|------------------------|--------------|--------------|
| Dx, g cm <sup>-3</sup> | 1.617        | 1.609        |
| Z                      | 4            | 8            |
| Mu (mm <sup>-1</sup> ) | 16.571       | 16.500       |
| F000                   | 1687.2       | 1679.0       |
| F000'                  | 1685.97      |              |
| h, k, lmax             | 17, 26, 13   | 17, 26, 13   |
| Nref                   | 3105         | 3038         |
| Tmin, Tmax             | 0.351, 0.372 | 0.458, 0.753 |
| Tmin'                  | 0.167        |              |

Correction method= # Reported T Limits: Tmin=0.458  
Tmax=0.753 AbsCorr = MULTI-SCAN

Data completeness= 0.978          Theta(max)= 66.019

R(reflections)= 0.0558( 1936)          wR2(reflections)= 0.1766( 3038)

S = 1.111                          Npar= 208

The following ALERTS were generated. Each ALERT has the format

**test-name\_ALERT\_alert-type\_alert-level.**

Click on the hyperlinks for more details of the test.

## Alert level C

[SHFSU01\\_ALERT\\_2\\_C](#) The absolute value of parameter shift to su ratio > 0.05

Absolute value of the parameter shift to su ratio given 0.090

Additional refinement cycles may be required.

[PLAT041\\_ALERT\\_1\\_C](#) Calc. and Reported SumFormula Strings Differ Please Check

[PLAT043\\_ALERT\\_1\\_C](#) Calculated and Reported Mol. Weight Differ by .. 4.22 Check

[PLAT068\\_ALERT\\_1\\_C](#) Reported F000 Differs from Calcd (or Missing)... Please Check

[PLAT077\\_ALERT\\_4\\_C](#) Unitcell contains non-integer number of atoms .. Please Check

[PLAT080\\_ALERT\\_2\\_C](#) Maximum Shift/Error ..... 0.09 Why ?

[PLAT250\\_ALERT\\_2\\_C](#) Large U3/U1 Ratio for Average U(i,j) Tensor .... 2.6 Note

[PLAT342\\_ALERT\\_3\\_C](#) Low Bond Precision on C-C Bonds ..... 0.0125 Ang.

[PLAT790\\_ALERT\\_4\\_C](#) Centre of Gravity not Within Unit Cell: Resd. # 1 Note

C30 H28 I2 N4 Zn

[PLAT911\\_ALERT\\_3\\_C](#) Missing # FCF Refl Between THmin & STh/L= 0.593 66 Report

[PLAT978\\_ALERT\\_2\\_C](#) Number C-C Bonds with Positive Residual Density 0 Note

## Alert level G

[FORMU01\\_ALERT\\_2\\_G](#) There is a discrepancy between the atom counts in the

\_chemical\_formula\_sum and the formula from the \_atom\_site\* data.

Atom count from \_chemical\_formula\_sum: C15.38 H14.38 Cl1.25 I1 N2 Zn0

Atom count from the \_atom\_site data: C15.4 H14.4 Cl1.3 I1 N2 Zn0.5

[CELLZ01\\_ALERT\\_1\\_G](#) Difference between formula and atom\_site contents detected.

CELLZ01\_ALERT\_1\_G ALERT: Large difference may be due to a symmetry error - see SYMMG tests

From the CIF: \_cell\_formula\_units\_Z 8

From the CIF: \_chemical\_formula\_sum C15.38 H14.38 Cl1.25 I N2 Zn0.50

TEST: Compare cell contents of formula and atom\_site data

| atom | Z*formula | cif sites | diff  |
|------|-----------|-----------|-------|
| C    | 123.04    | 123.20    | -0.16 |
| H    | 115.04    | 115.20    | -0.16 |
| Cl   | 10.00     | 10.40     | -0.40 |
| I    | 8.00      | 8.00      | 0.00  |
| N    | 16.00     | 16.00     | 0.00  |
| Zn   | 4.00      | 4.00      | 0.00  |

PLAT002\_ALERT\_2\_G Number of Distance or Angle Restraints on AtSite 4 Note

PLAT004\_ALERT\_5\_G Polymeric Structure Found with Maximum Dimension 1 Info

PLAT045\_ALERT\_1\_G Calculated and Reported Z Differ by a Factor ... 0.50 Check

PLAT176\_ALERT\_4\_G The CIF-Embedded .res File Contains SADI Records 1 Report

PLAT300\_ALERT\_4\_G Atom Site Occupancy of <Cl1 is Constrained at 0.4 Check

**And 5 other PLAT300 Alerts**

More ...

PLAT302\_ALERT\_4\_G Anion/Solvent Disorder ..... Percentage = 100 Note

PLAT720\_ALERT\_4\_G Number of Unusual/Non-Standard Labels ..... 1 Note

PLAT789\_ALERT\_4\_G Atoms with Negative \_atom\_site\_disorder\_group # 6 Check

PLAT860\_ALERT\_3\_G Number of Least-Squares Restraints ..... 3 Note

PLAT909\_ALERT\_3\_G Percentage of Observed Data at Theta(Max) Still 34 %

PLAT910\_ALERT\_3\_G Missing # of FCF Reflection(s) Below Theta(Min) 2 Note

PLAT933\_ALERT\_2\_G Number of OMIT records in Embedded RES ..... 5 Note

---

0 **ALERT level A** = Most likely a serious problem - resolve or explain

0 **ALERT level B** = A potentially serious problem, consider carefully

11 **ALERT level C** = Check. Ensure it is not caused by an omission or oversight

20 **ALERT level G** = General information/check it is not something unexpected

6 ALERT type 1 CIF construction/syntax error, inconsistent or missing data

7 ALERT type 2 Indicator that the structure model may be wrong or deficient

5 ALERT type 3 Indicator that the structure quality may be low

12 ALERT type 4 Improvement, methodology, query or suggestion

1 ALERT type 5 Informative message, check

---

It is advisable to attempt to resolve as many as possible of the alerts in all categories. Often the minor alerts point to easily fixed oversights, errors and omissions in your CIF or refinement strategy, so attention to these fine details can be worthwhile. In order to resolve some of the more serious problems it may be necessary to carry out additional measurements or structure refinements. However, the purpose of your study may justify the reported deviations and the more serious of these should normally be commented upon in the discussion or experimental section of a paper or in the "special\_details" fields of the CIF. checkCIF was carefully designed to identify outliers and unusual parameters, but every test has its limitations and alerts that are not important in a particular case may appear. Conversely, the absence of alerts does not guarantee there are no aspects of the results needing attention. It is up to the individual to critically assess their own results and, if necessary, seek expert advice.

## Publication of your CIF in IUCr journals

A basic structural check has been run on your CIF. These basic checks will be run on all CIFs submitted for publication in IUCr journals (*Acta Crystallographica*, *Journal of Applied Crystallography*, *Journal of Synchrotron Radiation*); however, if you intend to submit to *Acta Crystallographica Section C* or *E* or *IUCrData*, you should make sure that full publication checks are run on the final version of your CIF prior to submission.

## Publication of your CIF in other journals

Please refer to the *Notes for Authors* of the relevant journal for any special instructions relating to CIF submission.

---

PLATON version of 11/08/2016; check.def file version of 04/08/2016

## Datablock 3TCM\_100K - ellipsoid plot

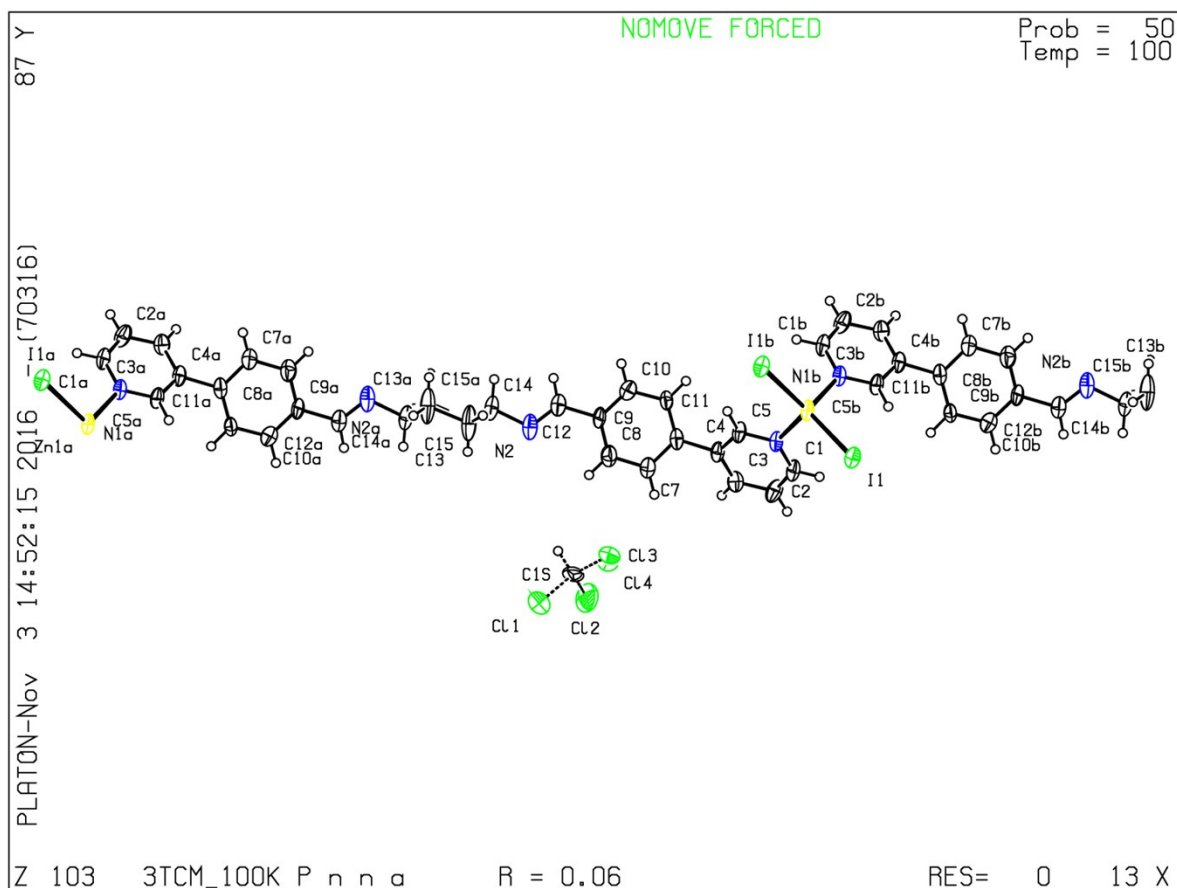

# checkCIF (basic structural check) running

---

Checking for embedded fcf data in CIF ...

Found embedded fcf data in CIF. Extracting fcf data from uploaded CIF, please wait . .

## checkCIF/PLATON (basic structural check)

---

Structure factors have been supplied for datablock(s) 1TCE200K

THIS REPORT IS FOR GUIDANCE ONLY. IF USED AS PART OF A REVIEW PROCEDURE FOR PUBLICATION, IT SHOULD NOT REPLACE THE EXPERTISE OF AN EXPERIENCED CRYSTALLOGRAPHIC REFEREE.

No syntax errors found.

Please wait while processing ....

[Structure factor report](#)

[CIF dictionary](#)

[Interpreting this report](#)

## Datablock: 1TCE200K

---

Bond precision: C-C = 0.0065 A Wavelength=1.54178

Cell: a=14.7372 (11) b=22.7121 (16) c=9.9658 (8)

alpha=90 beta=90 gamma=90

Temperature: 200 K

|                        | Calculated                  | Reported                    |
|------------------------|-----------------------------|-----------------------------|
| Volume                 | 3335.7 (4)                  | 3335.7 (4)                  |
| Space group            | P n n a                     | P n n a                     |
| Hall group             | -P 2a 2bc                   | -P 2a 2bc                   |
| Moiety formula         | C30 H28 Cl2 N4 Zn, C2 H Cl3 | ?                           |
| Sum formula            | C32 H29 Cl5 N4 Zn           | C16 H14.50 Cl2.50 N2 Zn0.50 |
| Mr                     | 712.23                      | 356.11                      |
| Dx, g cm <sup>-3</sup> | 1.418                       | 1.418                       |

|            |              |              |
|------------|--------------|--------------|
| Z          | 4            | 8            |
| Mu (mm-1)  | 4.926        | 4.926        |
| F000       | 1456.0       | 1456.0       |
| F000'      | 1459.77      |              |
| h, k, lmax | 17, 26, 11   | 17, 25, 11   |
| Nref       | 2904         | 2828         |
| Tmin, Tmax | 0.049, 0.052 | 0.531, 0.753 |
| Tmin'      | 0.008        |              |

Correction method= # Reported T Limits: Tmin=0.531  
Tmax=0.753 AbsCorr = MULTI-SCAN

Data completeness= 0.974          Theta(max)= 65.886

R(reflections)= 0.0839( 2207)          wR2(reflections)= 0.2599( 2828)

S = 1.040                          Npar= 213

The following ALERTS were generated. Each ALERT has the format

**test-name\_ALERT\_alert-type\_alert-level.**

Click on the hyperlinks for more details of the test.

## Alert level C

[RINTA01](#) ALERT 3 C The value of Rint is greater than 0.12

Rint given 0.141

[PLAT020](#) ALERT 3 C The value of Rint is greater than 0.12 ..... 0.141 Report

[PLAT084](#) ALERT 3 C High wR2 Value (i.e. > 0.25) ..... 0.26 Report

[PLAT341](#) ALERT 3 C Low Bond Precision on C-C Bonds ..... 0.0065 Ang.

[PLAT790](#) ALERT 4 C Centre of Gravity not Within Unit Cell: Resd. # 1 Note

C30 H28 Cl2 N4 Zn

[PLAT911](#) ALERT 3 C Missing # FCF Refl Between THmin & STh/L= 0.592 65 Report

[PLAT918](#) ALERT 3 C Reflection(s) with I(obs) much Smaller I(calc) . 2 Check

## Alert level G

[PLAT002](#) ALERT 2 G Number of Distance or Angle Restraints on AtSite 5 Note

[PLAT003](#) ALERT 2 G Number of Uiso or Uij Restrained non-H Atoms ... 5 Report

[PLAT004](#) ALERT 5 G Polymeric Structure Found with Maximum Dimension 1 Info

[PLAT045](#) ALERT 1 G Calculated and Reported Z Differ by a Factor ... 0.50 Check

[PLAT063](#) ALERT 4 G Crystal Size Likely too Large for Beam Size .... 0.80 mm

[PLAT072](#) ALERT 2 G SHELXL First Parameter in WGHT Unusually Large 0.19 Report

[PLAT172](#) ALERT 4 G The CIF-Embedded .res File Contains DFIX Records 1 Report

[PLAT176](#) ALERT 4 G The CIF-Embedded .res File Contains SADI Records 1 Report

[PLAT187](#) ALERT 4 G The CIF-Embedded .res File Contains RIGU Records 1 Report

[PLAT300](#) ALERT 4 G Atom Site Occupancy of \*Cl2 is Constrained at 0.5 Check

**And 5 other PLAT300 Alerts**

More ...

|         |         |   |                                                 |              |      |       |
|---------|---------|---|-------------------------------------------------|--------------|------|-------|
| PLAT302 | ALERT 4 | G | Anion/Solvent Disorder .....                    | Percentage = | 100  | Note  |
| PLAT720 | ALERT 4 | G | Number of Unusual/Non-Standard Labels .....     |              | 3    | Note  |
| PLAT789 | ALERT 4 | G | Atoms with Negative _atom_site_disorder_group # |              | 6    | Check |
| PLAT860 | ALERT 3 | G | Number of Least-Squares Restraints .....        |              | 28   | Note  |
| PLAT909 | ALERT 3 | G | Percentage of Observed Data at Theta(Max) Still |              | 54 % |       |
| PLAT978 | ALERT 2 | G | Number C-C Bonds with Positive Residual Density |              | 1    | Note  |

---

0 **ALERT level A** = Most likely a serious problem - resolve or explain  
0 **ALERT level B** = A potentially serious problem, consider carefully  
7 **ALERT level C** = Check. Ensure it is not caused by an omission or oversight  
21 **ALERT level G** = General information/check it is not something unexpected

1 ALERT type 1 CIF construction/syntax error, inconsistent or missing data  
4 ALERT type 2 Indicator that the structure model may be wrong or deficient  
8 ALERT type 3 Indicator that the structure quality may be low  
14 ALERT type 4 Improvement, methodology, query or suggestion  
1 ALERT type 5 Informative message, check

---

It is advisable to attempt to resolve as many as possible of the alerts in all categories. Often the minor alerts point to easily fixed oversights, errors and omissions in your CIF or refinement strategy, so attention to these fine details can be worthwhile. In order to resolve some of the more serious problems it may be necessary to carry out additional measurements or structure refinements. However, the purpose of your study may justify the reported deviations and the more serious of these should normally be commented upon in the discussion or experimental section of a paper or in the "special\_details" fields of the CIF. checkCIF was carefully designed to identify outliers and unusual parameters, but every test has its limitations and alerts that are not important in a particular case may appear. Conversely, the absence of alerts does not guarantee there are no aspects of the results needing attention. It is up to the individual to critically assess their own results and, if necessary, seek expert advice.

### Publication of your CIF in IUCr journals

A basic structural check has been run on your CIF. These basic checks will be run on all CIFs submitted for publication in IUCr journals (*Acta Crystallographica*, *Journal of Applied Crystallography*, *Journal of Synchrotron Radiation*); however, if you intend to submit to *Acta Crystallographica Section C* or *E* or *IUCrData*, you should make sure that full publication checks are run on the final version of your CIF prior to submission.

### Publication of your CIF in other journals

Please refer to the *Notes for Authors* of the relevant journal for any special instructions relating to CIF submission.

---

**PLATON version of 11/08/2016; check.def file version of 04/08/2016**

## Datablock 1TCE200K - ellipsoid plot

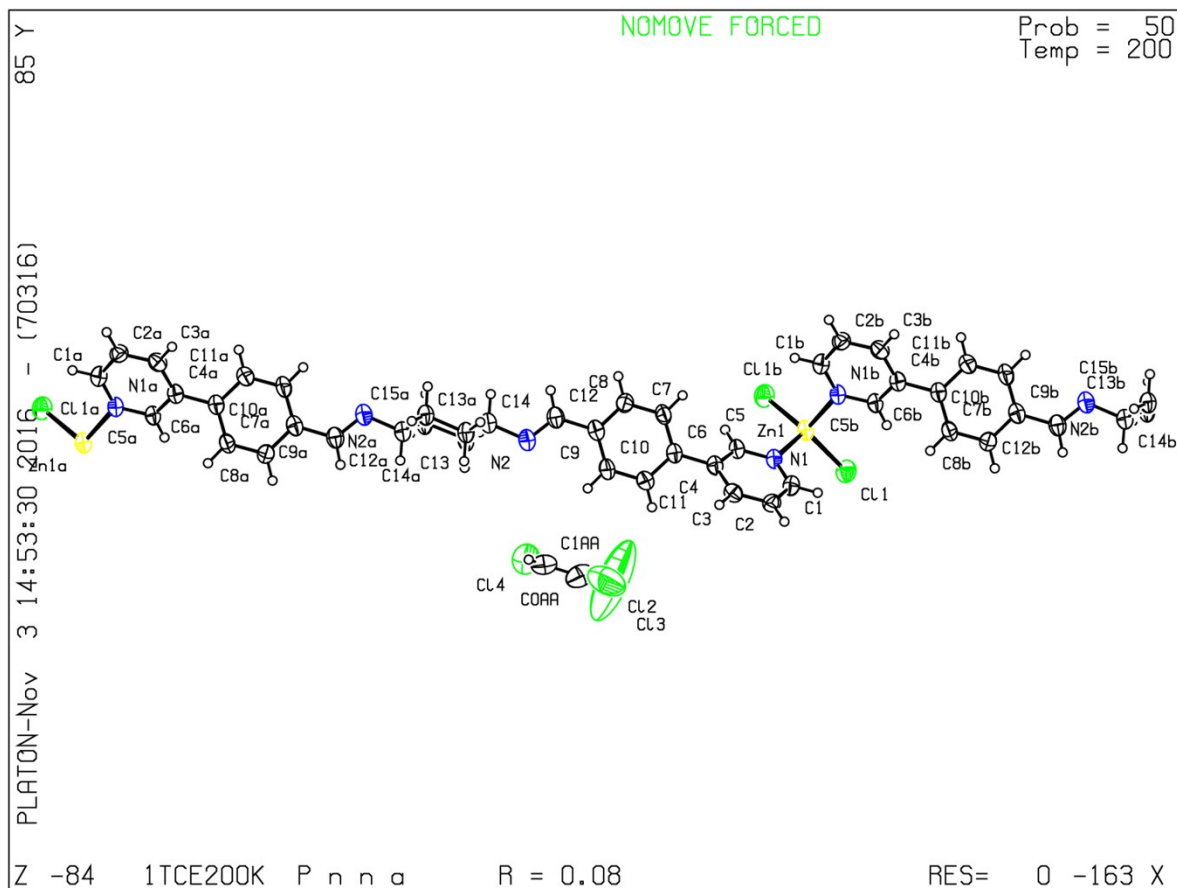

---

## checkCIF (basic structural check) running

---

Checking for embedded fcf data in CIF ...

Found embedded fcf data in CIF. Extracting fcf data from uploaded CIF, please wait . .

---

## checkCIF/PLATON (basic structural check)

---

Structure factors have been supplied for datablock(s) 1MeCN



THIS REPORT IS FOR GUIDANCE ONLY. IF USED AS PART OF A REVIEW PROCEDURE FOR PUBLICATION, IT SHOULD NOT REPLACE THE EXPERTISE OF AN EXPERIENCED CRYSTALLOGRAPHIC REFEREE.

No syntax errors found.  
Please wait while processing ....  
Structure factor report

CIF dictionary  
Interpreting this report

## Datablock: 1MeCN

---

Bond precision: C-C = 0.0055 Å Wavelength=1.54178

Cell: a=14.7485 (14) b=22.317 (2) c=10.4570 (11)  
alpha=90 beta=90 gamma=90

Temperature: 296 K

|                        | Calculated                    | Reported             |
|------------------------|-------------------------------|----------------------|
| Volume                 | 3441.8 (6)                    | 3441.8 (6)           |
| Space group            | P n n a                       | P n n a              |
| Hall group             | -P 2a 2bc                     | -P 2a 2bc            |
| Moiety formula         | C30 H28 Cl2 N4 Zn, 2(C2 H3 N) | ?                    |
| Sum formula            | C34 H34 Cl2 N6 Zn             | C17 H17 Cl N3 Zn0.50 |
| Mr                     | 662.96                        | 331.47               |
| Dx, g cm <sup>-3</sup> | 1.279                         | 1.279                |
| Z                      | 4                             | 8                    |
| Mu (mm <sup>-1</sup> ) | 2.660                         | 2.660                |
| F000                   | 1376.0                        | 1376.0               |
| F000'                  | 1375.66                       |                      |
| h, k, lmax             | 17, 26, 12                    | 0, 0, 0              |
| Nref                   | 3020                          | 2947                 |
| Tmin, Tmax             | 0.555, 0.587                  | 0.480, 0.616         |
| Tmin'                  | 0.329                         |                      |

Correction method= # Reported T Limits: Tmin=0.480  
Tmax=0.616 AbsCorr = REFDEL

Data completeness= 0.976            Theta (max)= 66.160  
R(reflections)= 0.0384( 2252)            wR2(reflections)= 0.1111( 2947)  
S = 1.017                                  Npar= 195

---

The following ALERTS were generated. Each ALERT has the format

**test-name\_ALERT\_alert-type\_alert-level.**

Click on the hyperlinks for more details of the test.

---

### Alert level B

[PLAT390\\_ALERT\\_3\\_B](#) Deviating Methyl C3S    X-C-H Bond Angle .....    100 Degree

---

### Alert level C

[PLAT243\\_ALERT\\_4\\_C](#) High 'Solvent' Ueq as Compared to Neighbors of    C1S Check

[PLAT390\\_ALERT\\_3\\_C](#) Deviating Methyl C3S    X-C-H Bond Angle .....    117 Degree

[PLAT790\\_ALERT\\_4\\_C](#) Centre of Gravity not Within Unit Cell: Resd. #    1 Note

C30 H28 Cl2 N4 Zn

[PLAT911\\_ALERT\\_3\\_C](#) Missing # FCF Refl Between THmin & STh/L= 0.593    73 Report

[PLAT978\\_ALERT\\_2\\_C](#) Number C-C Bonds with Positive Residual Density    0 Note

---

### Alert level G

[PLAT004\\_ALERT\\_5\\_G](#) Polymeric Structure Found with Maximum Dimension    1 Info

[PLAT045\\_ALERT\\_1\\_G](#) Calculated and Reported Z Differ by a Factor ...    0.50 Check

[PLAT344\\_ALERT\\_2\\_G](#) Unusual sp?    Angle Range in Solvent/Ion for .    C1S    Check

[PLAT367\\_ALERT\\_2\\_G](#) Long?    C(sp?)-C(sp?) Bond C1S    -    C3S    ..    1.68 Ang.

[PLAT720\\_ALERT\\_4\\_G](#) Number of Unusual/Non-Standard Labels .....    3 Note

[PLAT909\\_ALERT\\_3\\_G](#) Percentage of Observed Data at Theta(Max) Still    41 %

---

0 **ALERT level A** = Most likely a serious problem - resolve or explain

1 **ALERT level B** = A potentially serious problem, consider carefully

5 **ALERT level C** = Check. Ensure it is not caused by an omission or oversight

6 **ALERT level G** = General information/check it is not something unexpected

1 ALERT type 1 CIF construction/syntax error, inconsistent or missing data

3 ALERT type 2 Indicator that the structure model may be wrong or deficient

4 ALERT type 3 Indicator that the structure quality may be low

3 ALERT type 4 Improvement, methodology, query or suggestion

1 ALERT type 5 Informative message, check

---

It is advisable to attempt to resolve as many as possible of the alerts in all categories. Often the minor alerts point to easily fixed oversights, errors and omissions in your CIF or refinement strategy, so attention to these fine details can be worthwhile. In order to resolve some of the more serious problems it may be necessary to carry out additional measurements or structure refinements. However, the purpose of your study may justify the reported deviations and the more serious of these should normally be commented upon in the discussion or experimental section of a paper or in the "special\_details" fields of the CIF. checkCIF was carefully designed to identify outliers and unusual parameters, but every test has its limitations and alerts that are not

important in a particular case may appear. Conversely, the absence of alerts does not guarantee there are no aspects of the results needing attention. It is up to the individual to critically assess their own results and, if necessary, seek expert advice.

### **Publication of your CIF in IUCr journals**

A basic structural check has been run on your CIF. These basic checks will be run on all CIFs submitted for publication in IUCr journals (*Acta Crystallographica*, *Journal of Applied Crystallography*, *Journal of Synchrotron Radiation*); however, if you intend to submit to *Acta Crystallographica Section C* or *E* or *IUCrData*, you should make sure that [full publication checks](#) are run on the final version of your CIF prior to submission.

### **Publication of your CIF in other journals**

Please refer to the *Notes for Authors* of the relevant journal for any special instructions relating to CIF submission.

---

**PLATON version of 11/08/2016; check.def file version of 04/08/2016**

## **Datablock 1MeCN - ellipsoid plot**

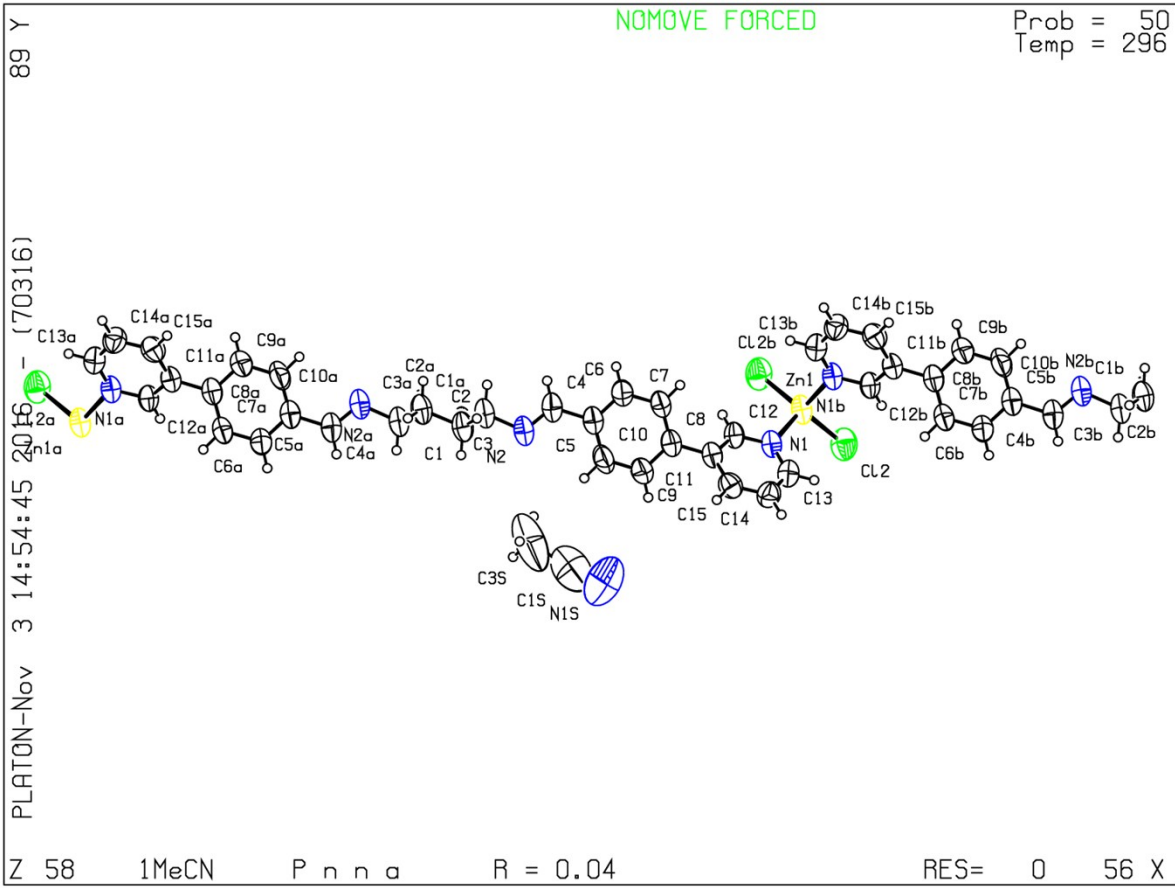

## checkCIF (basic structural check) running

---

Checking for embedded fcf data in CIF ...

Found embedded fcf data in CIF. Extracting fcf data from uploaded CIF, please wait . .

## checkCIF/PLATON (basic structural check)

---

Structure factors have been supplied for datablock(s) 2MeCN\_2

THIS REPORT IS FOR GUIDANCE ONLY. IF USED AS PART OF A REVIEW PROCEDURE FOR PUBLICATION, IT SHOULD NOT REPLACE THE EXPERTISE OF AN EXPERIENCED CRYSTALLOGRAPHIC REFEREE.

No syntax errors found.

Please wait while processing ....

[Structure factor report](#)

[CIF dictionary](#)

[Interpreting this report](#)

## Datablock: 2MeCN\_2

---

Bond precision: C-C = 0.0151 A Wavelength=1.54178

Cell: a=14.8955 (11) b=22.5127 (17) c=10.2599 (7)

alpha=90 beta=90 gamma=90

Temperature: 296 K

|                | Calculated                    | Reported             |
|----------------|-------------------------------|----------------------|
| Volume         | 3440.5(4)                     | 3440.5(4)            |
| Space group    | P n n a                       | P n n a              |
| Hall group     | -P 2a 2bc                     | -P 2a 2bc            |
| Moiety formula | C30 H28 Br2 N4 Zn, 2(C2 H3 N) | ?                    |
| Sum formula    | C34 H34 Br2 N6 Zn             | C17 H17 Br N3 Zn0.50 |
| Mr             | 751.86                        | 375.93               |

|                        |              |            |
|------------------------|--------------|------------|
| Dx, g cm <sup>-3</sup> | 1.452        | 1.452      |
| Z                      | 4            | 8          |
| Mu (mm <sup>-1</sup> ) | 3.954        | 3.954      |
| F000                   | 1520.0       | 1520.0     |
| F000'                  | 1511.31      |            |
| h, k, lmax             | 17, 26, 12   | 17, 26, 11 |
| Nref                   | 3020         | 2890       |
| Tmin, Tmax             | 0.827, 0.888 |            |
| Tmin'                  | 0.701        |            |

Correction method= Not given

Data completeness= 0.957                      Theta (max)= 66.205

R(reflections)= 0.1060( 1666)                      wR2(reflections)= 0.3070( 2890)

S = 0.960                                      Npar= 177

The following ALERTS were generated. Each ALERT has the format  
**test-name\_ALERT\_alert-type\_alert-level.**  
Click on the hyperlinks for more details of the test.

### **Alert level B**

[RINTA01\\_ALERT\\_3\\_B](#) The value of Rint is greater than 0.18  
Rint given 0.214

[SHFSU01\\_ALERT\\_2\\_B](#) The absolute value of parameter shift to su ratio > 0.10  
Absolute value of the parameter shift to su ratio given 0.152  
Additional refinement cycles may be required.

[PLAT020\\_ALERT\\_3\\_B](#) The value of Rint is greater than 0.12 ..... 0.214 Report

[PLAT029\\_ALERT\\_3\\_B](#) \_diffn\_measured\_fraction\_theta\_full value Low . 0.957 Note

[PLAT080\\_ALERT\\_2\\_B](#) Maximum Shift/Error ..... 0.15 Why ?

[PLAT341\\_ALERT\\_3\\_B](#) Low Bond Precision on C-C Bonds ..... 0.01512 Ang.

[PLAT413\\_ALERT\\_2\\_B](#) Short Inter XH3 .. XHn H2S3 .. H10 .. 1.91 Ang.

### **Alert level C**

[PLAT052\\_ALERT\\_1\\_C](#) Info on Absorption Correction Method Not Given Please Do !

[PLAT082\\_ALERT\\_2\\_C](#) High R1 Value ..... 0.11 Report

[PLAT084\\_ALERT\\_3\\_C](#) High wR2 Value (i.e. > 0.25) ..... 0.31 Report

[PLAT202\\_ALERT\\_3\\_C](#) Isotropic non-H Atoms in Anion/Solvent ..... 3 Check

[PLAT243\\_ALERT\\_4\\_C](#) High 'Solvent' Ueq as Compared to Neighbors of C3S Check

[PLAT790\\_ALERT\\_4\\_C](#) Centre of Gravity not Within Unit Cell: Resd. # 1 Note

C30 H28 Br2 N4 Zn

[PLAT905\\_ALERT\\_3\\_C](#) Negative K value in the Analysis of Variance ... -1.226 Report

[PLAT911\\_ALERT\\_3\\_C](#) Missing # FCF Refl Between THmin & STh/L= 0.593 120 Report

[PLAT934\\_ALERT\\_3\\_C](#) Number of (Iobs-Icalc)/SigmaW > 10 Outliers .... 1 Check

|         |       |   |   |                                                 |            |     |            |
|---------|-------|---|---|-------------------------------------------------|------------|-----|------------|
| PLAT972 | ALERT | 2 | C | Check Calcd Residual Density                    | 0.93A From | Br1 | -1.52 eA-3 |
| PLAT977 | ALERT | 2 | C | Check the Negative Difference Density on        | H2S3       |     | -0.46 eA-3 |
| PLAT978 | ALERT | 2 | C | Number C-C Bonds with Positive Residual Density |            |     | 0 Note     |

---

## Alert level G

|         |       |   |   |                                                  |      |  |          |
|---------|-------|---|---|--------------------------------------------------|------|--|----------|
| PLAT002 | ALERT | 2 | G | Number of Distance or Angle Restraints on AtSite |      |  | 3 Note   |
| PLAT003 | ALERT | 2 | G | Number of Uiso or Uij Restrained non-H Atoms ... |      |  | 3 Report |
| PLAT004 | ALERT | 5 | G | Polymeric Structure Found with Maximum Dimension |      |  | 1 Info   |
| PLAT045 | ALERT | 1 | G | Calculated and Reported Z Differ by a Factor ... | 0.50 |  | Check    |
| PLAT072 | ALERT | 2 | G | SHELXL First Parameter in WGHT Unusually Large   | 0.20 |  | Report   |
| PLAT172 | ALERT | 4 | G | The CIF-Embedded .res File Contains DFIX Records |      |  | 2 Report |
| PLAT173 | ALERT | 4 | G | The CIF-Embedded .res File Contains DANG Records |      |  | 1 Report |
| PLAT344 | ALERT | 2 | G | Unusual sp? Angle Range in Solvent/Ion for .     | C3S  |  | Check    |
| PLAT720 | ALERT | 4 | G | Number of Unusual/Non-Standard Labels .....      |      |  | 3 Note   |
| PLAT860 | ALERT | 3 | G | Number of Least-Squares Restraints .....         |      |  | 3 Note   |

---

0 **ALERT level A** = Most likely a serious problem - resolve or explain

7 **ALERT level B** = A potentially serious problem, consider carefully

12 **ALERT level C** = Check. Ensure it is not caused by an omission or oversight

10 **ALERT level G** = General information/check it is not something unexpected

2 ALERT type 1 CIF construction/syntax error, inconsistent or missing data

11 ALERT type 2 Indicator that the structure model may be wrong or deficient

10 ALERT type 3 Indicator that the structure quality may be low

5 ALERT type 4 Improvement, methodology, query or suggestion

1 ALERT type 5 Informative message, check

---

It is advisable to attempt to resolve as many as possible of the alerts in all categories. Often the minor alerts point to easily fixed oversights, errors and omissions in your CIF or refinement strategy, so attention to these fine details can be worthwhile. In order to resolve some of the more serious problems it may be necessary to carry out additional measurements or structure refinements. However, the purpose of your study may justify the reported deviations and the more serious of these should normally be commented upon in the discussion or experimental section of a paper or in the "special\_details" fields of the CIF. checkCIF was carefully designed to identify outliers and unusual parameters, but every test has its limitations and alerts that are not important in a particular case may appear. Conversely, the absence of alerts does not guarantee there are no aspects of the results needing attention. It is up to the individual to critically assess their own results and, if necessary, seek expert advice.

## Publication of your CIF in IUCr journals

A basic structural check has been run on your CIF. These basic checks will be run on all CIFs submitted for publication in IUCr journals (*Acta Crystallographica*, *Journal of Applied Crystallography*, *Journal of Synchrotron Radiation*); however, if you intend to submit to *Acta Crystallographica Section C* or *E* or *IUCrData*, you should make sure that full publication checks are run on the final version of your CIF prior to submission.

## Publication of your CIF in other journals

Please refer to the *Notes for Authors* of the relevant journal for any special instructions relating to CIF

submission.

PLATON version of 11/08/2016; check.def file version of 04/08/2016

## Datablock 2MeCN\_2 - ellipsoid plot

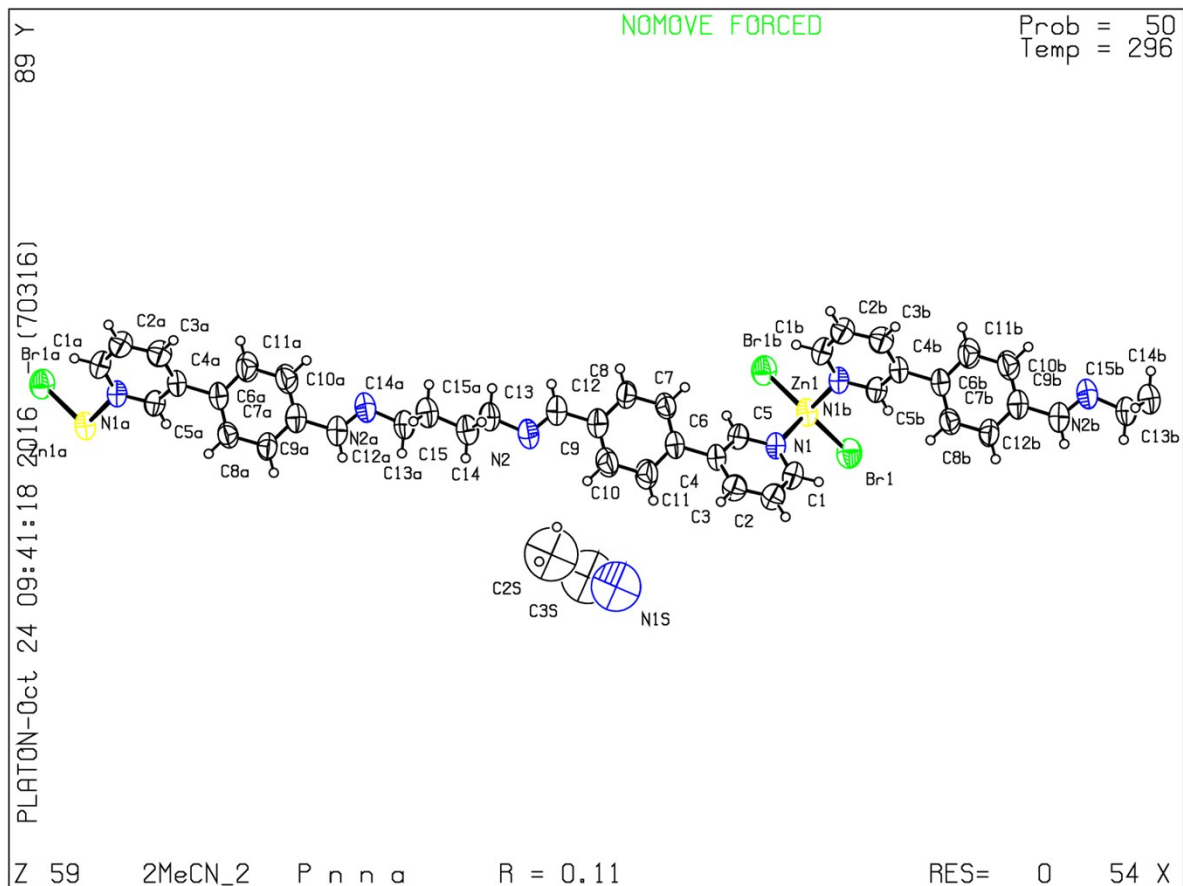

## checkCIF (basic structural check) running

Checking for embedded fcf data in CIF ...

Found embedded fcf data in CIF. Extracting fcf data from uploaded CIF, please wait . .



# checkCIF/PLATON (basic structural check)

---

Structure factors have been supplied for datablock(s) 3MeCN

THIS REPORT IS FOR GUIDANCE ONLY. IF USED AS PART OF A REVIEW PROCEDURE FOR PUBLICATION, IT SHOULD NOT REPLACE THE EXPERTISE OF AN EXPERIENCED CRYSTALLOGRAPHIC REFEREE.

No syntax errors found.  
Please wait while processing ....  
Structure factor report

CIF dictionary  
Interpreting this report

## Datablock: 3MeCN

---

Bond precision: C-C = 0.0350 Å Wavelength=1.54178

Cell: a=15.077 (3) b=22.570 (4) c=10.412 (2)  
alpha=90 beta=90 gamma=90

Temperature: 296 K

|                        | Calculated             | Reported                     |
|------------------------|------------------------|------------------------------|
| Volume                 | 3543.1 (12)            | 3543.2 (11)                  |
| Space group            | P n n a                | P n n a                      |
| Hall group             | -P 2a 2bc              | -P 2a 2bc                    |
| Moiety formula         | C30 H28 I2 N4 Zn, C2 N | ?                            |
| Sum formula            | C32 H28 I2 N5 Zn       | C16.50 H15.75 I N2.50 Zn0.50 |
| Mr                     | 801.78                 | 408.65                       |
| Dx, g cm <sup>-3</sup> | 1.503                  | 1.532                        |
| Z                      | 4                      | 8                            |
| Mu (mm <sup>-1</sup> ) | 14.840                 | 14.850                       |
| F000                   | 1564.0                 | 1602.0                       |
| F000'                  | 1558.98                |                              |
| h, k, lmax             | 17, 26, 12             | 17, 26, 12                   |
| Nref                   | 3105                   | 3012                         |

Tmin, Tmax 0.210, 0.227 0.004, 0.056

Tmin' 0.041

Correction method= # Reported T Limits: Tmin=0.004  
Tmax=0.056 AbsCorr = CYLINDER

Data completeness= 0.970 Theta(max)= 66.084

R(reflections)= 0.1506( 796) wR2(reflections)= 0.4593( 3012)

S = 1.004 Npar= 155

---

The following ALERTS were generated. Each ALERT has the format

**test-name\_ALERT\_alert-type\_alert-level.**

Click on the hyperlinks for more details of the test.

---

### Alert level A

[RINTA01\\_ALERT\\_3\\_A](#) The value of Rint is greater than 0.25

Rint given 0.367

**Author Response: Due to weak diffraction at high angles as it was small crystal.**

[PLAT020\\_ALERT\\_3\\_A](#) The value of Rint is greater than 0.12 ..... 0.367 Report

**Author Response: Due to weak diffraction at high angles as it was small crystal.**

[PLAT084\\_ALERT\\_3\\_A](#) High wR2 Value (i.e. > 0.25) ..... 0.46 Report

**Author Response: Due to weak diffraction at high angles as it was small crystal.**

---

### Alert level B

[PLAT043\\_ALERT\\_1\\_B](#) Calculated and Reported Mol. Weight Differ by .. 15.52 Check

[PLAT234\\_ALERT\\_4\\_B](#) Large Hirshfeld Difference C6 -- C7 .. 0.28 Ang.

[PLAT342\\_ALERT\\_3\\_B](#) Low Bond Precision on C-C Bonds ..... 0.035 Ang.

---

### Alert level C

[CHEMW03\\_ALERT\\_2\\_C](#) The ratio of given/expected molecular weight as

calculated from the \_atom\_site\* data lies outside

the range 0.99 <> 1.01

From the CIF: \_cell\_formula\_units\_Z 8

From the CIF: \_chemical\_formula\_weight 408.65

TEST: Calculate formula weight from \_atom\_site\_\*

| atom | mass | num | sum |
|------|------|-----|-----|
|------|------|-----|-----|

|   |       |       |        |
|---|-------|-------|--------|
| C | 12.01 | 16.00 | 192.18 |
|---|-------|-------|--------|

|   |      |       |       |
|---|------|-------|-------|
| H | 1.01 | 14.00 | 14.11 |
|---|------|-------|-------|

|   |       |      |       |
|---|-------|------|-------|
| N | 14.01 | 2.50 | 35.02 |
|---|-------|------|-------|

|    |       |      |       |
|----|-------|------|-------|
| Zn | 65.39 | 0.50 | 32.69 |
|----|-------|------|-------|

|   |        |      |        |
|---|--------|------|--------|
| I | 126.90 | 1.00 | 126.90 |
|---|--------|------|--------|

Calculated formula weight 400.91

[PLAT041\\_ALERT\\_1\\_C](#) Calc. and Reported SumFormula Strings Differ Please Check

[PLAT068\\_ALERT\\_1\\_C](#) Reported F000 Differs from Calcd (or Missing)... Please Check

[PLAT082\\_ALERT\\_2\\_C](#) High R1 Value ..... 0.15 Report

PLAT241 ALERT 2 C High 'MainMol' Ueq as Compared to Neighbors of C1 Check  
 PLAT242 ALERT 2 C Low 'MainMol' Ueq as Compared to Neighbors of C16 Check  
 PLAT369 ALERT 2 C Long C(sp2)-C(sp2) Bond C4 - C6 .. 1.53 Ang.  
 PLAT790 ALERT 4 C Centre of Gravity not Within Unit Cell: Resd. # 1 Note  
 C30 H28 I2 N4 Zn  
 PLAT905 ALERT 3 C Negative K value in the Analysis of Variance ... -5.464 Report  
 PLAT905 ALERT 3 C Negative K value in the Analysis of Variance ... -2.072 Report  
 PLAT911 ALERT 3 C Missing # FCF Refl Between THmin & STh/L= 0.593 94 Report  
 PLAT972 ALERT 2 C Check Calcd Residual Density 0.92A From I1 -1.71 eA-3  
 PLAT978 ALERT 2 C Number C-C Bonds with Positive Residual Density 0 Note

## Alert level G

FORMU01 ALERT 2 G There is a discrepancy between the atom counts in the  
 \_chemical\_formula\_sum and the formula from the \_atom\_site\* data.  
 Atom count from \_chemical\_formula\_sum: C16.5 H15.75 I1 N2.5 Zn0.5  
 Atom count from the \_atom\_site data: C16 H14 I1 N2.5 Zn0.5  
 CELLZ01 ALERT 1 G Difference between formula and atom\_site contents detected.  
 CELLZ01 ALERT 1 G ALERT: Large difference may be due to a  
 symmetry error - see SYMMG tests  
 From the CIF: \_cell\_formula\_units\_Z 8  
 From the CIF: \_chemical\_formula\_sum C16.50 H15.75 I N2.50 Zn0.50  
 TEST: Compare cell contents of formula and atom\_site data

| atom | Z*formula | cif sites | diff  |
|------|-----------|-----------|-------|
| C    | 132.00    | 128.00    | 4.00  |
| H    | 126.00    | 112.00    | 14.00 |
| I    | 8.00      | 8.00      | 0.00  |
| N    | 20.00     | 20.00     | 0.00  |
| Zn   | 4.00      | 4.00      | 0.00  |

PLAT002 ALERT 2 G Number of Distance or Angle Restraints on AtSite 3 Note  
 PLAT003 ALERT 2 G Number of Uiso or Uij Restrained non-H Atoms ... 3 Report  
 PLAT004 ALERT 5 G Polymeric Structure Found with Maximum Dimension 1 Info  
 PLAT045 ALERT 1 G Calculated and Reported Z Differ by a Factor ... 0.50 Check  
 PLAT072 ALERT 2 G SHELXL First Parameter in WGHT Unusually Large 0.20 Report  
 PLAT172 ALERT 4 G The CIF-Embedded .res File Contains DFIX Records 4 Report  
 PLAT186 ALERT 4 G The CIF-Embedded .res File Contains ISOR Records 2 Report  
 PLAT300 ALERT 4 G Atom Site Occupancy of \*N3S is Constrained at 0.5 Check  
 PLAT300 ALERT 4 G Atom Site Occupancy of \*C2S is Constrained at 0.5 Check  
 PLAT302 ALERT 4 G Anion/Solvent Disorder ..... Percentage = 67 Note  
 PLAT860 ALERT 3 G Number of Least-Squares Restraints ..... 3 Note

3 **ALERT level A** = Most likely a serious problem - resolve or explain  
 3 **ALERT level B** = A potentially serious problem, consider carefully  
 13 **ALERT level C** = Check. Ensure it is not caused by an omission or oversight  
 14 **ALERT level G** = General information/check it is not something unexpected

6 ALERT type 1 CIF construction/syntax error, inconsistent or missing data  
 11 ALERT type 2 Indicator that the structure model may be wrong or deficient  
 8 ALERT type 3 Indicator that the structure quality may be low  
 7 ALERT type 4 Improvement, methodology, query or suggestion  
 1 ALERT type 5 Informative message, check

---

It is advisable to attempt to resolve as many as possible of the alerts in all categories. Often the minor alerts point to easily fixed oversights, errors and omissions in your CIF or refinement strategy, so attention to these fine details can be worthwhile. In order to resolve some of the more serious problems it may be necessary to carry out additional measurements or structure refinements. However, the purpose of your study may justify the reported deviations and the more serious of these should normally be commented upon in the discussion or experimental section of a paper or in the "special\_details" fields of the CIF. checkCIF was carefully designed to identify outliers and unusual parameters, but every test has its limitations and alerts that are not important in a particular case may appear. Conversely, the absence of alerts does not guarantee there are no aspects of the results needing attention. It is up to the individual to critically assess their own results and, if necessary, seek expert advice.

### **Publication of your CIF in IUCr journals**

A basic structural check has been run on your CIF. These basic checks will be run on all CIFs submitted for publication in IUCr journals (*Acta Crystallographica*, *Journal of Applied Crystallography*, *Journal of Synchrotron Radiation*); however, if you intend to submit to *Acta Crystallographica Section C* or *E* or *IUCrData*, you should make sure that [full publication checks](#) are run on the final version of your CIF prior to submission.

### **Publication of your CIF in other journals**

Please refer to the *Notes for Authors* of the relevant journal for any special instructions relating to CIF submission.

---

**PLATON version of 11/08/2016; check.def file version of 04/08/2016**

## **Datablock 3MeCN - ellipsoid plot**

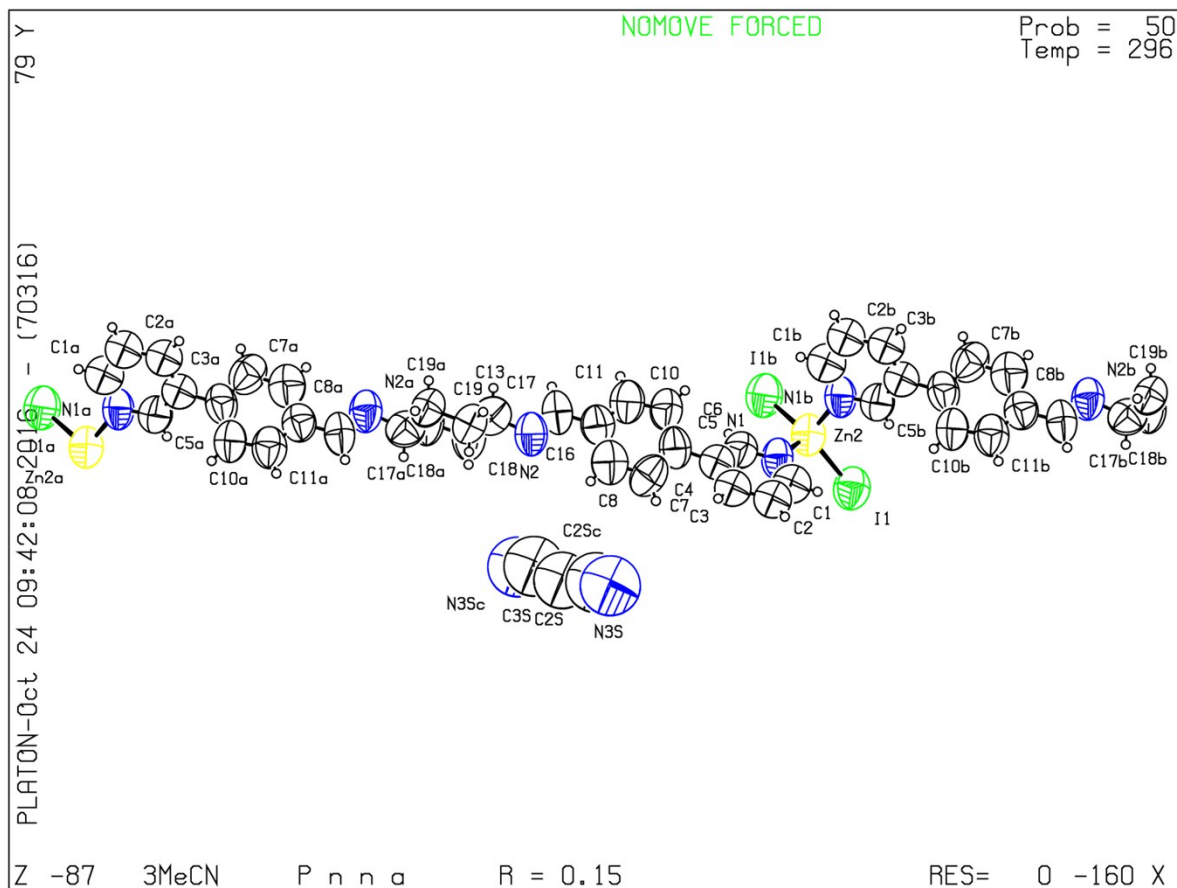


---

## checkCIF (basic structural check) running

---

Checking for embedded fcf data in CIF ...

Found embedded fcf data in CIF. Extracting fcf data from uploaded CIF, please wait . .

## checkCIF/PLATON (basic structural check)

---

Structure factors have been supplied for datablock(s) 3MeCN\_100K

THIS REPORT IS FOR GUIDANCE ONLY. IF USED AS PART OF A REVIEW PROCEDURE FOR PUBLICATION, IT SHOULD NOT REPLACE THE EXPERTISE OF AN EXPERIENCED CRYSTALLOGRAPHIC REFEREE.

No syntax errors found.  
Please wait while processing ....  
Structure factor report

CIF dictionary  
Interpreting this report

## Datablock: 3MeCN\_100K

---

Bond precision: C-C = 0.0103 Å Wavelength=1.54178

Cell: a=14.9803 (14) b=22.7330 (19) c=10.0998 (8)  
alpha=90 beta=90 gamma=90

Temperature: 100 K

|                        | Calculated             | Reported                  |
|------------------------|------------------------|---------------------------|
| Volume                 | 3439.5 (5)             | 3439.5 (5)                |
| Space group            | P n n a                | P n n a                   |
| Hall group             | -P 2a 2bc              | -P 2a 2bc                 |
| Moiety formula         | C30 H28 I2 N4 Zn, C2 N | ?                         |
| Sum formula            | C32 H28 I2 N5 Zn       | C16.50 H17 I N2.50 Zn0.50 |
| Mr                     | 801.78                 | 409.91                    |
| Dx, g cm <sup>-3</sup> | 1.548                  | 1.583                     |
| Z                      | 4                      | 8                         |
| Mu (mm <sup>-1</sup> ) | 15.287                 | 15.298                    |
| F000                   | 1564.0                 | 1612.0                    |
| F000'                  | 1558.98                |                           |
| h, k, lmax             | 17, 26, 11             | 0, 0, 0                   |
| Nref                   | 2997                   | 2940                      |
| Tmin, Tmax             | 0.199, 0.217           | 0.009, 0.017              |
| Tmin'                  | 0.081                  |                           |

Correction method= # Reported T Limits: Tmin=0.009  
Tmax=0.017 AbsCorr = REFDEL

Data completeness= 0.981            Theta (max)= 65.867  
R(reflections)= 0.0513( 2285)        wR2(reflections)= 0.1370( 2940)  
S = 1.154                            Npar= 175

---

The following ALERTS were generated. Each ALERT has the format

**test-name\_ALERT\_alert-type\_alert-level.**

Click on the hyperlinks for more details of the test.

---

## Alert level B

[PLAT043\\_ALERT\\_1\\_B](#) Calculated and Reported Mol. Weight Differ by ..    18.04 Check

---

## Alert level C

[CHEMW03\\_ALERT\\_2\\_C](#) The ratio of given/expected molecular weight as  
calculated from the `_atom_site*` data lies outside  
the range 0.99 <> 1.01

From the CIF: `_cell_formula_units_Z`                            8

From the CIF: `_chemical_formula_weight`                        409.91

TEST: Calculate formula weight from `_atom_site_*`

| atom | mass   | num   | sum    |
|------|--------|-------|--------|
| C    | 12.01  | 16.00 | 192.18 |
| H    | 1.01   | 14.00 | 14.11  |
| N    | 14.01  | 2.50  | 35.02  |
| Zn   | 65.39  | 0.50  | 32.69  |
| I    | 126.90 | 1.00  | 126.90 |

Calculated formula weight                            400.91

[PLAT041\\_ALERT\\_1\\_C](#) Calc. and Reported SumFormula Strings Differ    Please Check

[PLAT068\\_ALERT\\_1\\_C](#) Reported F000 Differs from Calcd (or Missing)...    Please Check

[PLAT342\\_ALERT\\_3\\_C](#) Low Bond Precision on C-C Bonds .....    0.01031 Ang.

[PLAT790\\_ALERT\\_4\\_C](#) Centre of Gravity not Within Unit Cell: Resd. #    1 Note

C30 H28 I2 N4 Zn

[PLAT911\\_ALERT\\_3\\_C](#) Missing # FCF Refl Between THmin & STh/L= 0.592    57 Report

[PLAT975\\_ALERT\\_2\\_C](#) Check Calcd Residual Density 0.99A From N1S    0.61 eA-3

[PLAT978\\_ALERT\\_2\\_C](#) Number C-C Bonds with Positive Residual Density    0 Note

---

## Alert level G

[FORMU01\\_ALERT\\_2\\_G](#) There is a discrepancy between the atom counts in the  
`_chemical_formula_sum` and the formula from the `_atom_site*` data.

Atom count from `_chemical_formula_sum`: C16.5 H17 I1 N2.5 Zn0.5

Atom count from the `_atom_site` data: C16 H14 I1 N2.5 Zn0.5

[CELLZ01\\_ALERT\\_1\\_G](#) Difference between formula and `_atom_site` contents detected.

[CELLZ01\\_ALERT\\_1\\_G](#) ALERT: Large difference may be due to a

symmetry error - see SYMMG tests

From the CIF: `_cell_formula_units_Z`    8

From the CIF: `_chemical_formula_sum` C16.50 H17 I N2.50 Zn0.50

TEST: Compare cell contents of formula and `_atom_site` data

| atom | Z*formula | cif sites | diff  |
|------|-----------|-----------|-------|
| C    | 132.00    | 128.00    | 4.00  |
| H    | 136.00    | 112.00    | 24.00 |

|         |         |       |                                                  |             |
|---------|---------|-------|--------------------------------------------------|-------------|
| I       | 8.00    | 8.00  | 0.00                                             |             |
| N       | 20.00   | 20.00 | 0.00                                             |             |
| Zn      | 4.00    | 4.00  | 0.00                                             |             |
| PLAT002 | ALERT 2 | G     | Number of Distance or Angle Restraints on AtSite | 3 Note      |
| PLAT003 | ALERT 2 | G     | Number of Uiso or Uij Restrained non-H Atoms ... | 3 Report    |
| PLAT004 | ALERT 5 | G     | Polymeric Structure Found with Maximum Dimension | 1 Info      |
| PLAT045 | ALERT 1 | G     | Calculated and Reported Z Differ by a Factor ... | 0.50 Check  |
| PLAT083 | ALERT 2 | G     | SHELXL Second Parameter in WGHT Unusually Large  | 17.70 Why ? |
| PLAT172 | ALERT 4 | G     | The CIF-Embedded .res File Contains DFIX Records | 2 Report    |
| PLAT300 | ALERT 4 | G     | Atom Site Occupancy of *N1S is Constrained at    | 0.5 Check   |
| PLAT300 | ALERT 4 | G     | Atom Site Occupancy of *C2S is Constrained at    | 0.5 Check   |
| PLAT302 | ALERT 4 | G     | Anion/Solvent Disorder ..... Percentage =        | 67 Note     |
| PLAT860 | ALERT 3 | G     | Number of Least-Squares Restraints .....         | 2 Note      |
| PLAT909 | ALERT 3 | G     | Percentage of Observed Data at Theta(Max) Still  | 54 %        |

- 
- 0 **ALERT level A** = Most likely a serious problem - resolve or explain  
 1 **ALERT level B** = A potentially serious problem, consider carefully  
 8 **ALERT level C** = Check. Ensure it is not caused by an omission or oversight  
 14 **ALERT level G** = General information/check it is not something unexpected

- 6 ALERT type 1 CIF construction/syntax error, inconsistent or missing data  
 7 ALERT type 2 Indicator that the structure model may be wrong or deficient  
 4 ALERT type 3 Indicator that the structure quality may be low  
 5 ALERT type 4 Improvement, methodology, query or suggestion  
 1 ALERT type 5 Informative message, check
- 

It is advisable to attempt to resolve as many as possible of the alerts in all categories. Often the minor alerts point to easily fixed oversights, errors and omissions in your CIF or refinement strategy, so attention to these fine details can be worthwhile. In order to resolve some of the more serious problems it may be necessary to carry out additional measurements or structure refinements. However, the purpose of your study may justify the reported deviations and the more serious of these should normally be commented upon in the discussion or experimental section of a paper or in the "special\_details" fields of the CIF. checkCIF was carefully designed to identify outliers and unusual parameters, but every test has its limitations and alerts that are not important in a particular case may appear. Conversely, the absence of alerts does not guarantee there are no aspects of the results needing attention. It is up to the individual to critically assess their own results and, if necessary, seek expert advice.

### Publication of your CIF in IUCr journals

A basic structural check has been run on your CIF. These basic checks will be run on all CIFs submitted for publication in IUCr journals (*Acta Crystallographica*, *Journal of Applied Crystallography*, *Journal of Synchrotron Radiation*); however, if you intend to submit to *Acta Crystallographica Section C* or *E* or *IUCrData*, you should make sure that full publication checks are run on the final version of your CIF prior to submission.

### Publication of your CIF in other journals

Please refer to the *Notes for Authors* of the relevant journal for any special instructions relating to CIF submission.



PLATON version of 11/08/2016; check.def file version of 04/08/2016

## Datablock 3MeCN\_100K - ellipsoid plot

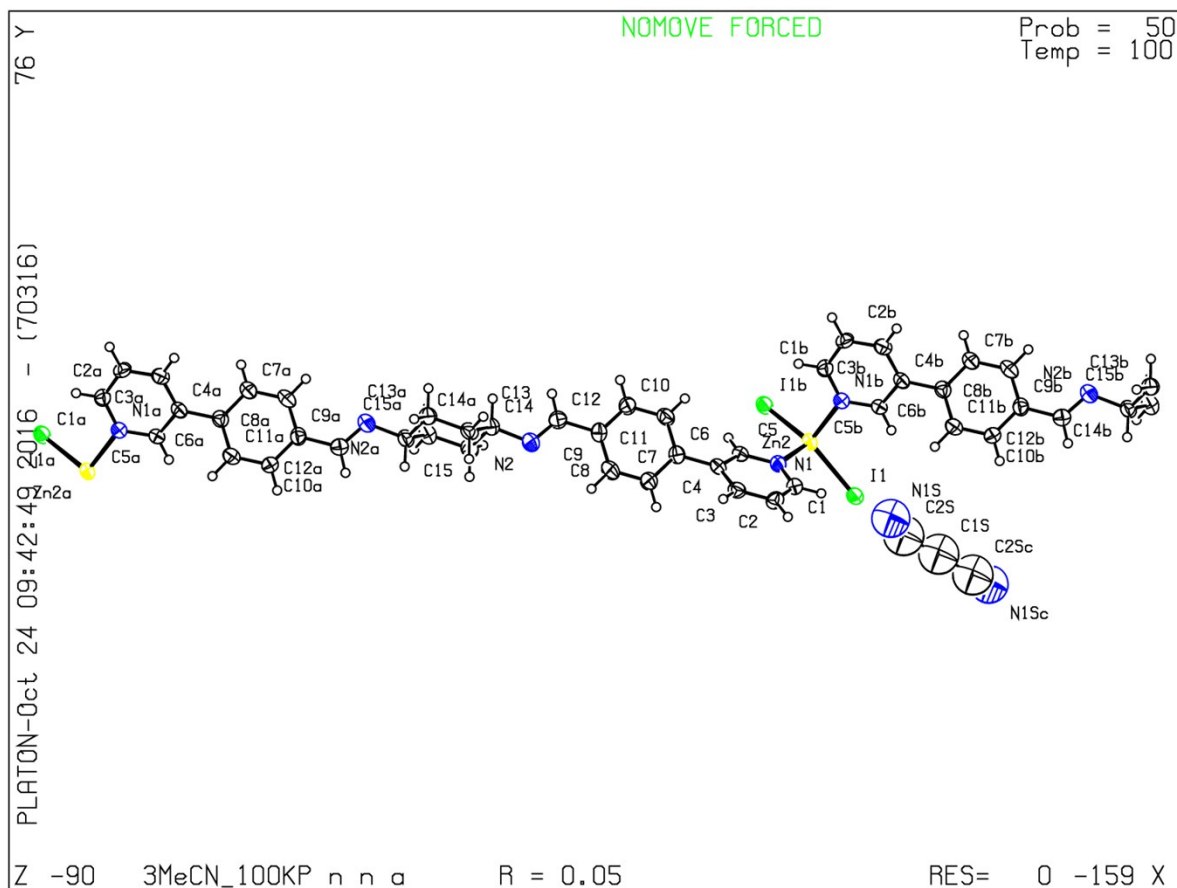

Supplement: c6dt03803d1.pdf [file c6dt03803d1.pdf]
